# Supplementary material
Source: MDPI journal article supplement (https://www.mdpi.com/search?q=forests-09-00214)
Supplement: s001 [file forests-09-00214-s001.pdf]

## Supplementary Material

### Supplementary A: BTP/ZNP comparison

Betampona is an isolated fragment of the once continuous Zahamena corridor forest, which extended from the coast to the central highlands of Madagascar until it was deforested over the last century. We expected species composition and structure within the study regions of these two forests to be similar given their similar elevational ranges. A comparison of aboveground biomass, basal area and stem counts per PFT between these two sites indicates that they are closely related (Figure A1). Though the total stem number for trees >10cm DBH was similar (1296 and 1444 for BNP and ZNP respectively), BTP had higher stem numbers of the largest PFTs (PFTs 1 and 2), as well as PFT 4. ZNP had greater numbers of sub-canopy and smaller trees (PFT 6, 8 and 11).

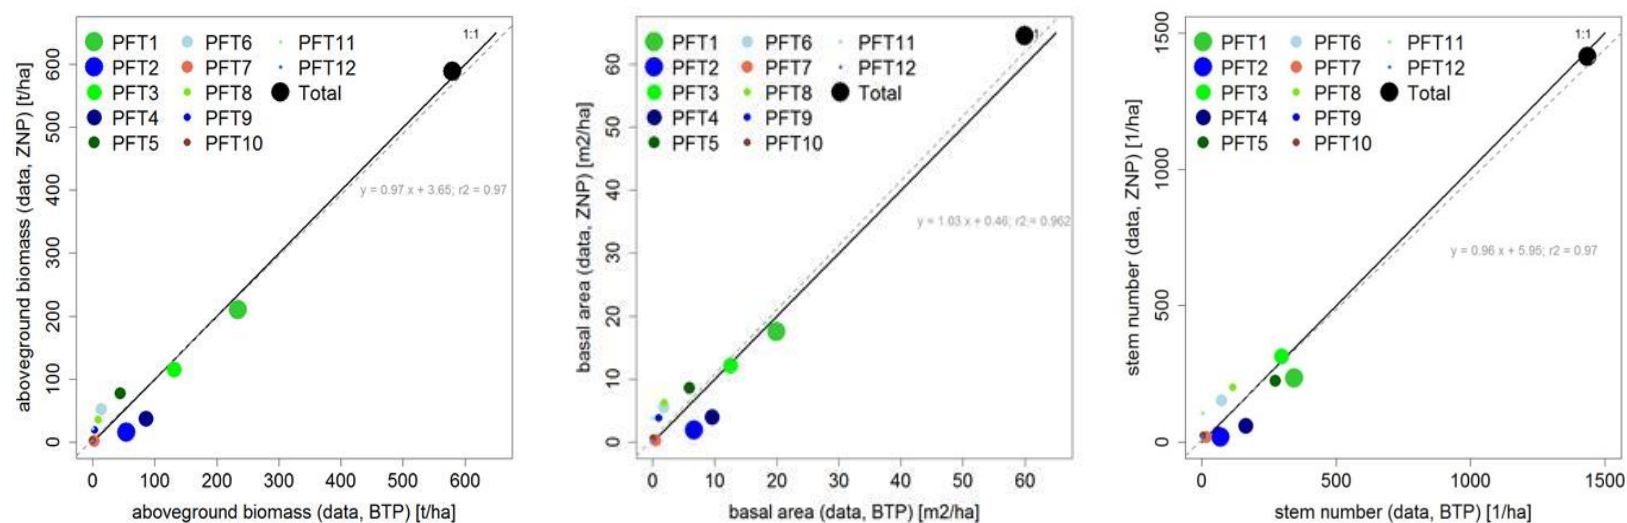

**Figure A1.** A comparison of key variables: aboveground biomass (left), basal area (middle) and stem number per hectare (right) for Betampona (BTP – x-axis) and Zahamena National Park (ZNP – y-axis). Dot colors correspond to shade tolerance class as shown in chart above, and dot sizes correspond to size class (canopy emergent, canopy, sub-canopy, understory, woody treelet) Shade tolerant plant functional types are color coded in greens, intermediate tolerance is in blues and shade tolerant species are in red.

To assess the differences in the comparative accuracies through time, Figure 6 shows successional groups related to light requirements for BTP and ZNP. It is interesting to note that there are relatively few shade intolerant trees overall in the forest, but especially in the initial colonization of the forest simulation. Initially, only a small number of shade intolerant trees colonize the bare ground, the overwhelming majority of the biomass is from to intermediate tree growth. In both forests (Figure 4), shade tolerant trees are underestimated by FORMIND, but both are within the margin of the range in biomass seen throughout the simulation. Intermediate trees are overestimated at both sites, though the simulation numbers do match the field numbers at around year 375 of the simulation, when shade tolerant trees account for the highest percentage of biomass and intolerant trees are at their lowest. However, these forests are both very old and have not been clearcut in the past 400 years. Rather, the cause is more likely that a number of species were placed in the wrong plant functional groups. With regard to the composition of stems, the size classes were slightly underestimated in the numbers of smaller trees found in Zahamena (Figure A1). The diameter size class of 0.3-0.4m had the greatest under-representation by the model, followed by larger 0.4-0.5 and 0.5-0.6 stems. The model slightly overestimates the 0.1-0.2m sapling numbers. However, there is strong agreement between the simulation forest and field data with respect to the smaller numbers of larger trees.

### Supplementary B: Model Parameter Values

**Table B-1** The FORMIND Model Madagascar parameterization global variables, where  $t_{end}$  is the end of simulation time,  $t_y$  is the time step (i.e. 1 year),  $A_{area}$  is the simulation forest area,  $A_{patch}$  is a the smallest unit of forest within the model,  $MaxGrp$  is the number of plant functional types,  $\Delta h$  is the stepwidth of vertical discretization of the canopy, and AET is actual evapotranspiration (mm). A full description of Model parameters and their associated equations can be found in Fischer et al [17].

|              | Parameter   | Unit                | Value |
|--------------|-------------|---------------------|-------|
| General      | $t_{end}$   | yr                  | 1000  |
|              | $t_y$       | yr                  | 1     |
|              | $A_{area}$  | ha                  | 50    |
|              | $A_{patch}$ | m <sup>2</sup>      | 400   |
|              | MaxGrp      |                     | 12    |
|              | $\Delta h$  | m                   | 0.5   |
| Carbon cycle | AET         | mm yr <sup>-1</sup> | 1350  |

**Table B-2** The FORMIND Model Madagascar parameterization plant functional type specific variable values. A full description of Model parameters can be found in Fischer et al [17].

|                | Parameter         | Unit                                                             | Plant functional type (PFT) |         |         |         |         |         |         |         |         |         |         |         |
|----------------|-------------------|------------------------------------------------------------------|-----------------------------|---------|---------|---------|---------|---------|---------|---------|---------|---------|---------|---------|
|                |                   |                                                                  | 1                           | 2       | 3       | 4       | 5       | 6       | 7       | 8       | 9       | 10      | 11      | 12      |
| allometry      | $H_{\max}$        | m                                                                | 47                          | 47      | 33      | 33      | 24      | 24      | 24      | 16      | 16      | 16      | 10      | 10      |
|                | $h_0$             |                                                                  | 40.5                        | 39.2    | 37.7    | 33.8    | 39.2    | 37.3    | 29.7    | 19      | 22.3    | 23.1    | 16.4    | 15.9    |
|                | $h_1$             |                                                                  | 0.56                        | 0.71    | 0.53    | 0.48    | 0.56    | 0.54    | 0.39    | 0.34    | 0.41    | 0.36    | 0.31    | 0.3     |
|                | $c_{l0}$          |                                                                  | 0.3                         | 0.3     | 0.3     | 0.3     | 0.3     | 0.3     | 0.3     | 0.3     | 0.3     | 0.3     | 0.3     | 0.3     |
|                | $c_{d0}$          |                                                                  | 15                          | 15      | 15      | 15      | 15      | 15      | 15      | 15      | 15      | 15      | 15      | 15      |
|                | $c_{d1}$          |                                                                  | 0                           | 0       | 0       | 0       | 0       | 0       | 0       | 0       | 0       | 0       | 0       | 0       |
|                | $q$               | $\text{tODM m}^{-3}$                                             | 0.53                        | 0.48    | 0.53    | 0.48    | 0.48    | 0.5     | 0.35    | 0.49    | 0.31    | 0.32    | 0.51    | 0.48    |
|                | $\sigma$          |                                                                  | 0.7                         | 0.7     | 0.7     | 0.7     | 0.7     | 0.7     | 0.7     | 0.7     | 0.7     | 0.7     | 0.7     | 0.7     |
|                | $f_0$             |                                                                  | 0.56                        | 0.56    | 0.56    | 0.56    | 0.56    | 0.56    | 0.56    | 0.56    | 0.56    | 0.56    | 0.56    | 0.56    |
|                | $f_1$             |                                                                  | -0.11                       | -0.11   | -0.11   | -0.11   | -0.11   | -0.11   | -0.11   | -0.11   | -0.11   | -0.11   | -0.11   | -0.11   |
| recruitment    | $l_0$             |                                                                  | 3.49                        | 3.49    | 3.49    | 3.49    | 3.49    | 3.49    | 3.49    | 3.49    | 3.49    | 3.49    | 3.49    | 3.49    |
|                | $l_1$             |                                                                  | 0.1                         | 0.1     | 0.1     | 0.1     | 0.1     | 0.1     | 0.1     | 0.1     | 0.1     | 0.1     | 0.1     | 0.1     |
|                | $N_{\text{seed}}$ | $\text{ha}^{-1} \text{yr}^{-1}$                                  | 155                         | 50      | 150     | 12      | 50      | 10      | 3       | 40      | 8       | 5       | 1       | 1       |
|                | $I_{\text{seed}}$ |                                                                  | 0                           | 0.04    | 0       | 0.04    | 0       | 0.04    | 0.07    | 0       | 0       | 0.07    | 0       | 0.04    |
|                | $D_{\text{min}}$  | m                                                                | 0.05                        | 0.05    | 0.05    | 0.05    | 0.05    | 0.05    | 0.05    | 0.05    | 0.05    | 0.05    | 0.05    | 0.05    |
| mortality      | $M_B$             | $\text{yr}^{-1}$                                                 | 0.01                        | 0.021   | 0.02    | 0.02    | 0.015   | 0.02    | 0.09    | 0.02    | 0.03    | 0.09    | 0.01    | 0.02    |
|                | $m_{i0}$          |                                                                  | -7.7175                     | -7.7175 | -7.7175 | -7.7175 | -7.7175 | -7.7175 | -7.7175 | -7.7175 | -7.7175 | -7.7175 | -7.7175 | -7.7175 |
|                | $m_{i1}$          |                                                                  | 1553.7                      | 1553.7  | 1553.7  | 1553.7  | 1553.7  | 1553.7  | 1553.7  | 1553.7  | 1553.7  | 1553.7  | 1553.7  | 1553.7  |
|                | $m_{i2}$          |                                                                  | -                           | -       | -       | -       | -113150 | -       | -       | -113150 | -113150 | -       | -113150 | -       |
|                |                   |                                                                  | 113150                      | 113150  | 113150  | 113150  |         | 113150  | 113150  |         | 113150  | 113150  | 113150  | 113150  |
| photosynthesis | $f_{\text{fall}}$ |                                                                  | 0.4                         | 0.4     | 0.4     | 0.4     | 0.4     | 0.4     | 0.4     | 0.4     | 0.4     | 0.4     | 0.4     | 0.4     |
|                | $I_0$             | $\mu\text{mol}_{\text{photon}} \text{m}^{-2} \text{s}^{-1}$      | 1000                        | 1000    | 1000    | 1000    | 1000    | 1000    | 1000    | 1000    | 1000    | 1000    | 1000    | 1000    |
|                | $k$               |                                                                  | 0.7                         | 0.7     | 0.7     | 0.7     | 0.7     | 0.7     | 0.7     | 0.7     | 0.7     | 0.7     | 0.7     | 0.7     |
|                | $l_{\text{day}}$  | h                                                                | 12                          | 12      | 12      | 12      | 12      | 12      | 12      | 12      | 12      | 12      | 12      | 12      |
|                | $p_{\text{max}}$  | $\mu\text{mol}_{\text{CO}_2} \mu\text{mol}_{\text{photon}}^{-1}$ | 2.4                         | 6.2     | 4.1     | 7.1     | 4.3     | 7.1     | 17.5    | 4.3     | 7.1     | 17.5    | 4.3     | 7.1     |
|                | $\alpha$          | $\mu\text{mol}_{\text{CO}_2} \text{m}^{-2} \text{s}^{-1}$        | 0.042                       | 0.042   | 0.042   | 0.042   | 0.042   | 0.042   | 0.042   | 0.042   | 0.042   | 0.042   | 0.042   | 0.042   |
|                | $m$               |                                                                  | 0.1                         | 0.1     | 0.1     | 0.1     | 0.1     | 0.1     | 0.1     | 0.1     | 0.1     | 0.1     | 0.1     | 0.1     |
|                | $g_0$             |                                                                  | 23.58                       | 14      | 45.45   | 10.49   | 50.34   | 19.82   | 8.47    | 114.2   | 31.94   | 10      | 26.31   | 7.37    |
| $g_1$          |                   | 4.4                                                              | 4.29                        | 7.01    | 3.1     | 11.39   | 4.8     | 4.37    | 23.23   | 11.36   | 8.27    | 16.7    | 6.01    |         |

**Table B-3** The FORMIND model variable description. A full description of all model parameters can be found in Fischer et al [17].

| <b>Parameter</b>         | <b>Description</b>                                               |
|--------------------------|------------------------------------------------------------------|
| $H_{\max}$               | maximum tree height                                              |
| $h_0, h_1$               | coefficients of height-stem diameter-relationship                |
| $c_{l0}$                 | coefficient of crown length-height-relationship                  |
| $c_{d0}, c_{d1}$         | coefficients of crown diameter-stem diameter-relationship        |
| $\rho$                   | wood density                                                     |
| $\sigma$                 | ratio of total aboveground biomass to stem biomass               |
| $f_0, f_1$               | coefficients of form factor-stem diameter-relationship           |
| $l_0, l_1$               | coefficients of LAI-stem diameter-relationship                   |
| $N_{\text{seed}}$        | global in-growth rate of seeds                                   |
| $I_{\text{seed}}$        | fraction of incoming radiation at floor required for germination |
| $D_{\min}$               | initial stem diameter of a germinated seedlings                  |
| $M_B$                    | basic mortality rate                                             |
| $m_{i0}, m_{i1}, m_{i2}$ | mortality rate dependent on stem diameter increment              |
| $f_{\text{fall}}$        | probability for a dead tree to fall                              |
| $I_0$                    | incoming irradiance on top of canopy                             |
| $k$                      | light extinction coefficient                                     |
| $l_{\text{day}}$         | day length                                                       |
| $p_{\max}$               | maximum leaf gross photosynthetic rate                           |
| $\alpha$                 | initial slope of light response curve                            |
| $m$                      | transmission coefficient                                         |
| $g_0, g_1$               | coefficients of the growth function                              |

### Supplementary C: RNI Betampona Inventory Plot Summary

**Table C-1.** This RNI Betampona inventory plot summary table lists the Family, Scientific Name and Malagasy name for each species of tree measured within the 100 small inventory plots in 2004 and 2005. For each species, the FORMIND model plant functional type number is listed, as well as stem count per hectare, diameter growth in centimeters and height growth measured in meters. Unknown species are denoted by an asterix. In addition, species that were only measured during one of the years and thus growth could not be calculated were denoted by a dash. .

| Family         | Scientific Name              | MalagasyName    | PFT | Stem Count per hectare | Diameter Growth Increment (cm) | Height Growth Increment (m) |
|----------------|------------------------------|-----------------|-----|------------------------|--------------------------------|-----------------------------|
| Malvaceae      | Hildegardia perrieri         | Afobonoa        | 8   | 3                      | -                              | -                           |
| Malvaceae      | Grewia cuneifolia            | Afopotsy        | 8   | 15                     | 0.203                          | 0.52                        |
| Malvaceae      | Grewia sp.1                  | Afopotsy (B)    | 3   | 15                     | 0.427                          | 1.24                        |
| Malvaceae      | Grewia sp.2                  | Afopotsy (M)    | 8   | 1                      | -                              | -                           |
| Malvaceae      | Grewia sp.3                  | Afopotsy (S)    | 8   | 9                      | 0.203                          | 0.65                        |
| Malvaceae      | Nesogordonia sp.1            | Afotrakora      | 3   | 23                     | 0.248                          | 0.59                        |
| Apocynaceae    | Voacanga thouarsii           | Akangarano      | 5   | 11                     | 0.231                          | 0.60                        |
| Sarcolenaceae  | Leptolaena sp.1              | Amaninombilahy  | 5   | 3                      | 0.000                          | 1.08                        |
| Araliaceae     | Polyscias sp.1               | Ambona          | 8   | 1                      | 0.270                          | 1.54                        |
| Araliaceae     | Polyscias sp.3               | Ambonambona     | 3   | 74                     | 0.364                          | 0.81                        |
| Araliaceae     | Polyscias sp.5               | Ambonambona (B) | 6   | 4                      | 0.240                          | 0.53                        |
| Monimiaceae    | Ephippiandra sp.1            | Ambora          | 8   | 18                     | 0.178                          | 0.75                        |
| Monimiaceae    | Ephippiandra sp.2            | Ambora (S)      | 11  | 1                      | 0.090                          | 0.93                        |
| Monimiaceae    | Tambourissa madagascariensis | Amborambe       | 11  | 4                      | 0.450                          | -0.23                       |
| Menispermaceae | Burasaia gracilis            | Amborasaha      | 11  | 3                      | -                              | -                           |
| Menispermaceae | Burasaia sp.1                | Amborasaha      | 8   | 9                      | 0.015                          | 0.73                        |
| Pittosporaceae | Pittosporum ochrosiaefolium  | Ambovitsika     | 8   | 17                     | 0.118                          | 1.17                        |
| Moraceae       | Ficus sorocoides             | Ampalirano      | 11  | 6                      | 0.023                          | 0.18                        |
| Moraceae       | Streblus mauritiana          | Ampaly          | 9   | 8                      | 0.548                          | 0.75                        |
| Celtidaceae    | Trema sp.1                   | Andrarazina     | 10  | 1                      | 0.080                          | 0.53                        |
| Arecaceae      | Ravenea sambiranensis        | Anivona         | 9   | 27                     | 0.533                          | 1.25                        |
| Rubiaceae      | Fernelia sp.1                | Ankahatra       | 5   | 41                     | 0.138                          | 0.70                        |

|               |                           |                   |    |    |       |       |
|---------------|---------------------------|-------------------|----|----|-------|-------|
| Rubiaceae     | Fernelia sp.2             | Ankahatra (B)     | 11 | 4  | 0.407 | 1.04  |
| Combretaceae  | Terminalia catappa        | Antafanala        | 6  | 4  | 0.000 | -1.19 |
| Apocynaceae   | Petchia sp.2              | Antafara          | 6  | 3  | -     | -     |
| Apocynaceae   | Petchia sp.6              | Antafarana        | 9  | 1  | -     | -     |
| Lauraceae     | Ocotea recemosa           | Antafonana        | 6  | 17 | 0.406 | 1.40  |
| Lauraceae     | Beilschmiedia sp.1        | Antevaratra       | 1  | 56 | 0.206 | 0.93  |
| Lauraceae     | Beilschmiedia sp.2        | Antevaratra (S)   | 11 | 1  | -     | -     |
| Bignoniaceae  | Phyllarthron ilicifolium  | Antohiravina      | 8  | 4  | 0.203 | 0.99  |
| Sarcolenaceae | Rhodolaena sp.2           | Arina             | 8  | 14 | 0.187 | 1.19  |
| *             | *                         | Arongaparhihy     | 9  | 1  | -     | -     |
| *             | *                         | Asina             | 12 | 1  | -     | -     |
| Combretaceae  | Terminalia fatraea        | Atafanala         | 4  | 10 | 0.336 | 0.64  |
| Verbenaceae   | Clerodendron aucubifolium | Atamba            | 9  | 15 | 0.168 | 0.38  |
| Dilleniaceae  | Dillenia triquert         | Bararaty          | 5  | 43 | 0.092 | 0.89  |
| *             | *                         | Drehaethatera     | 11 | 1  | -     | -     |
| Rutaceae      | Zanthoxylum sp.1          | Fahavalontrazo    | 3  | 10 | 0.216 | 1.22  |
| Rutaceae      | Zanthoxylum sp.2          | Fahavalotrazana   | 11 | 1  | -     | -     |
| Rutaceae      | Zanthoxylum sp.3          | Fahavalotrazo (M) | 11 | 1  | 0.090 | 1.10  |
| Sapotaceae    | Chrysophyllum biovinianum | Famelona          | 5  | 13 | 0.074 | 0.75  |
| Aphloiaceae   | Aphloia theaformis        | Fandramanana      | 5  | 24 | 0.153 | 0.59  |
| Icacinacea    | Cassinopsis chapelieri    | Fandrianakanga    | 5  | 11 | 0.385 | 1.06  |
| Fabaceae      | Viguieranthus sp.1        | Fanempoka         | 4  | 1  | 0.540 | 1.57  |
| Fabaceae      | Bauhinia humblotiana      | Fanitokakolahy    | 11 | 4  | 0.225 | 1.22  |
| Cyatheaceae   | Cyathea sp.1              | Fanzana           | 8  | 94 | 0.412 | 0.71  |
| Rubiaceae     | Mussaenda pervillei       | Fatora            | 11 | 4  | 0.450 | 1.67  |
| Rutaceae      | Vepris fitoravy           | Fitoravina        | 12 | 5  | 0.108 | -0.06 |
| Myrtaceae     | Eugenia onivensis         | Gavoala           | 9  | 4  | 0.207 | 0.57  |
| Fabaceae      | Baudouinia louvelii       | Gavombazaha       | 12 | 4  | -     | -     |
| Myrtaceae     | Psidium cattleianum       | Guavo             | 10 | 3  | 0.045 | 0.62  |
| Malvaceae     | Dombeya sp.2              | Hafomena          | 7  | 20 | 0.094 | 0.52  |
| Malvaceae     | Dombeya sp.3              | Hafotra           | 10 | 4  | 2.050 | 1.11  |
| Euphorbiaceae | Bridelia tulasneana       | Harina            | 5  | 1  | 0.000 | -0.24 |

|                  |                                   |                   |    |    |       |      |
|------------------|-----------------------------------|-------------------|----|----|-------|------|
| Clusiaceae       | Psorospermum lamianum             | Harongaparhihy    | 6  | 1  | -     | -    |
| Convallariaceae  | Dracaena sp.1                     | Hasina            | 8  | 27 | 0.135 | 0.18 |
| Convallariaceae  | Dracaena sp.2                     | Hasina (B)        | 9  | 25 | 0.238 | 0.51 |
| Convallariaceae  | Dracaena reflexa                  | Hasina (M)        | 11 | 34 | 0.049 | 0.71 |
| Convallariaceae  | Dracaena reflexa var linearifolia | Hasina (S)        | 8  | 5  | 0.168 | 0.38 |
| Anacardiaceae    | Faguetia falcata                  | Hasy              | 9  | 1  | 0.260 | 0.94 |
| *                | *                                 | Havolena          | 5  | 1  | -     | -    |
| Clusiaceae       | Symphonia sp.1                    | Hazinina          | 1  | 31 | 0.139 | 0.89 |
| Clusiaceae       | Symphonia sp.2                    | Hazinina (B)      | 1  | 57 | 0.145 | 0.75 |
| Clusiaceae       | Symphonia louvelli                | Hazinina (S)      | 3  | 32 | 0.255 | 0.70 |
| Annonaceae       | Xylophia buxifolia                | Hazoambo          | 1  | 38 | 0.268 | 1.06 |
| Annonaceae       | Xylophia sp.1                     | Hazoambo (B)      | 1  | 1  | 0.000 | 1.43 |
| Annonaceae       | Xylophia sp.2                     | Hazoambomena      | 5  | 3  | -     | -    |
| Anisophyllaceae  | Anisophyllea fallax               | Hazoharaka        | 3  | 4  | 0.360 | 2.02 |
| Ebenaceae        | Diospyros tetraclis               | Hazomafana        | 8  | 5  | 0.000 | 1.10 |
| Ebenaceae        | Diospyros gracilipes              | Hazomainty        | 5  | 85 | 0.146 | 0.82 |
| Ebenaceae        | Diospyros toxicaria               | Hazomainty (M)    | 11 | 4  | 0.590 | 0.64 |
| Ebenaceae        | Diospyros haplostylis             | Hazomainty (S)    | 5  | 1  | -     | -    |
| Ebenaceae        | Diospyros bernieriana             | Hazomainty (VL)   | 8  | 3  | 0.045 | 1.36 |
| Rhizophoraceae   | Cassipourea sp.1                  | Hazomalany        | 5  | 22 | 0.398 | 1.11 |
| Rhizophoraceae   | Cassipourea lanceolata            | Hazomalany (B)    | 3  | 78 | 0.287 | 0.95 |
| Rhizophoraceae   | Cassipourea sp.3                  | Hazomalany (M)    | 8  | 5  | 0.090 | 0.37 |
| Rhizophoraceae   | Cassipourea sp.2                  | Hazomalany (S)    | 5  | 11 | 0.137 | 0.86 |
| *                | *                                 | Hazomamiala       | 3  | 11 | 0.139 | 0.73 |
| *                | *                                 | Hazomamiala (B)   | 11 | 1  | 0.080 | 1.47 |
| Anisophylleaceae | Anisophyllea fallax               | Hazomamy          | 5  | 20 | 0.107 | 0.64 |
| Anacardiaceae    | Abrahamia sp.1                    | Hazombarorona     | 4  | 55 | 0.167 | 0.76 |
| Anacardiaceae    | Abrahamia sp.2                    | Hazombarorona (M) | 6  | 1  | -     | -    |
| Sapindaceae      | Tina sp.1                         | Hazombato         | 3  | 8  | 0.178 | 0.72 |
| Fabaceae         | Albizia sp.                       | Hazomborona       | 2  | 3  | 0.910 | 0.09 |
| Passifloraceae   | Paropsia sp.1                     | Hazomitovo        | 9  | 9  | 0.090 | 0.38 |
| Euphorbiaceae    | Tannodia sp.1                     | Hazondomoina      | 3  | 1  | -     | -    |

|                |                             |                        |    |     |       |       |
|----------------|-----------------------------|------------------------|----|-----|-------|-------|
| Myrsinaceae    | Oncostemum sp.1             | Hazontoho              | 8  | 6   | 0.056 | 1.27  |
| Myrsinaceae    | Oncostemum sp.7             | Hazontoho (B)          | 8  | 8   | 0.172 | 0.96  |
| Myrsinaceae    | Oncostemum sp.3             | Hazontoho (M)          | 8  | 1   | 0.000 | 0.14  |
| Myrsinaceae    | Oncostemum sp.4             | Hazontoho (S)          | 8  | 3   | 0.080 | -0.14 |
| Myrsinaceae    | Oncostemon formosum         | Hazontoho mena         | 8  | 8   | -     | -     |
| Myrsinaceae    | Oncostemum sp.5             | Hazontoho potsy        | 8  | 3   | -     | -     |
| Myrsinaceae    | Oncostemum sp.6             | Hazotoko fotsy         | 11 | 3   | -     | -     |
| *              | *                           | Hazotsiariana          | 8  | 4   | -     | -     |
| Euphorbiaceae  | Suregada sp.2               | Hazovoangy             | 6  | 41  | 0.287 | 0.86  |
| Euphorbiaceae  | Suregada sp.5               | Hazovoangy (S)         | 9  | 5   | -     | -     |
| Fabaceae       | Dalbergia graveana          | Hazovola (Palissandre) | 1  | 45  | 0.426 | 1.23  |
| Fabaceae       | Millettia sp.1              | Hitsika                | 8  | 3   | 0.180 | 0.12  |
| Icacinaceae    | Grisollea myriantha         | Hompa                  | 5  | 3   | 0.090 | 1.00  |
| Rubiaceae      | Coffea sp.1                 | Kafe                   | 12 | 5   | -     | -     |
| Rubiaceae      | Coffea millotii             | Kafeala                | 9  | 14  | 0.273 | 0.48  |
| Asteraceae     | Brachylaena sp.1            | Kisaka                 | 3  | 5   | 0.040 | 0.92  |
| Cunoniaceae    | Weinmannia sp.1             | Lalona                 | 1  | 10  | 0.452 | 0.67  |
| Euphorbiaceae  | Anthostema madagascariensis | Lalotona               | 1  | 195 | 0.194 | 0.75  |
| Meliaceae      | Turraea sp.1                | Lambafo                | 12 | 1   | -     | -     |
| Euphorbiaceae  | Croton nobilis              | Lazalaza               | 9  | 20  | 0.118 | 0.12  |
| Gentianaceae   | Anthocleista amplexicaulis  | Lendena                | 8  | 4   | 0.057 | 1.10  |
| Hamamelidaceae | Dicoryphe sp.1              | Longotra               | 1  | 23  | 1.135 | 1.02  |
| Hamamelidaceae | Dicoryphe sp.2              | Longotra (B)           | 8  | 1   | 0.270 | 0.61  |
| Lauraceae      | Aspidostemon perrieri       | Longotra fotsy         | 5  | 6   | -     | -     |
| Lauraceae      | Aspidostemon elliotri       | Longotra mena          | 8  | 3   | -     | -     |
| Pittosporaceae | Pittosporum sp.1            | Maimboloha             | 9  | 3   | -     | -     |
| Euphorbiaceae  | Macaranga sp.1              | Makaranana             | 10 | 11  | 0.091 | 1.23  |
| *              | *                           | Mamoalava              | 8  | 9   | 0.090 | 0.54  |
| Fabaceae       | Cynometra sp.1              | Mampay                 | 3  | 27  | 0.249 | 0.68  |
| Rubiaceae      | Psychotria sp.1             | Maporia                | 11 | 1   | -     | -     |
| Sapindaceae    | Begonia apetalia            | Marakoditra            | 3  | 17  | 0.196 | 0.74  |
| Euphorbiaceae  | Blotia sp.1                 | Maroando               | 8  | 53  | 0.057 | 0.83  |



|                 |                             |                       |    |     |        |       |
|-----------------|-----------------------------|-----------------------|----|-----|--------|-------|
| Anacardiaceae   | Campylospermum sp.1         | Menahihy              | 5  | 43  | 1.030  | 0.86  |
| Anacardiaceae   | Campylospermum obtusifolium | Menahihy (B)          | 5  | 56  | 0.156  | 0.87  |
| Anacardiaceae   | Campylospermum lanceolatum  | Menahihy (M)          | 8  | 3   | -      | -     |
| Erythroxylaceae | Campylospermum sp.2         | Menahihy (S)          | 8  | 55  | 0.460  | 0.63  |
| Arecaceae       | Dypsis lastelliana          | Menavozona            | 9  | 6   | 0.760  | 1.67  |
| Malvaceae       | Dombeya sp.4                | Molanga               | 10 | 4   | 0.310  | 0.31  |
| Elaeocarpaceae  | Elaeocarpus sp.1            | Molopangady           | 3  | 13  | 0.180  | 0.06  |
| Elaeocarpaceae  | Elaeocarpus sp.2            | Molopangady (S)       | 5  | 1   | -      | -     |
| Elaeocarpaceae  | Elaeocarpus sp.3            | Molopangady fotsy     | 3  | 56  | 0.267  | 0.83  |
| Elaeocarpaceae  | Elaeocarpus sp.4            | Molopangady fotsy (S) | 5  | 1   | 0.640  | 1.06  |
| Elaeocarpaceae  | Elaeocarpus sp.5            | Molopangady mena      | 3  | 8   | 0.158  | 1.18  |
| Euphorbiaceae   | Macaranga sp.2              | Mongy                 | 12 | 3   | 0.000  | -0.01 |
| Sapotaceae      | Capurodendron sp.1          | Nanto                 | 1  | 19  | 0.130  | 1.07  |
| Anacardiaceae   | Camptosperma parvifolium    | Nanto (B)             | 3  | 1   | 0.000  | 2.42  |
| Sapotaceae      | Faucherea sp.1              | Nanto (M)             | 5  | 1   | -0.090 | 0.75  |
| Sapotaceae      | Faucherea thouvenotii       | Nanto (S)             | 4  | 20  | 0.209  | 0.90  |
| Sapotaceae      | Faucherea sp.2              | Nanto (VL)            | 5  | 3   | 0.000  | 0.45  |
| Anacardiaceae   | Michronychia tsiramiramy    | Oditrovny             | 8  | 4   | 0.135  | 0.33  |
| Annonaceae      | Isolona sp.2                | Ombary                | 11 | 1   | -      | -     |
| Sapindaceae     | Eugenia sp.1                | Ompa                  | 6  | 8   | -      | -     |
| Arecaceae       | Dypsis fasciculata          | Ovana                 | 9  | 71  | 0.146  | 0.46  |
| Arecaceae       | Ravenea sp.1                | Ovatsarorona          | 12 | 1   | -      | -     |
| Arecaceae       | Oriana trispatha            | Ovobola fotsy         | 5  | 27  | 0.103  | 0.83  |
| Arecaceae       | Dypsis sp.2                 | Ovodafa               | 9  | 8   | 0.210  | 0.61  |
| Arecaceae       | Dypsis sp.3                 | Ovotahitso            | 4  | 17  | 0.620  | 1.08  |
| Pandanaceae     | Pandanus sp.1               | Pandanus              | 8  | 52  | 0.138  | 0.70  |
| Burseraceae     | Canarium madagascariensis   | Ramy                  | 1  | 55  | 0.641  | 1.00  |
| Burseraceae     | Canarium sp.3               | Ramy (B)              | 3  | 4   | 0.270  | 1.34  |
| Myrsinaceae     | Maulouchia coriacea         | Rara                  | 3  | 70  | 0.230  | 0.89  |
| Myristicaceae   | Haematodendron glabrum      | Rara fotsy            | 5  | 1   | -      | -     |
| Myristicaceae   | Mauloutchia humblotii       | Rara mena             | 8  | 1   | -      | -     |
| Strelitziaceae  | Ravenala madagascariensis   | Ravinala              | 2  | 136 | 0.795  | 0.74  |

|               |                         |                   |    |    |       |       |
|---------------|-------------------------|-------------------|----|----|-------|-------|
| Myrtaceae     | Syzygyum emirnensis     | Robary            | 6  | 5  | -     | -     |
| Myrtaceae     | Eugenia sp.2            | Rodambo           | 12 | 3  | -     | -     |
| Sapindaceae   | Tinopsis urchii         | Romendafa         | 5  | 3  | 0.450 | 1.77  |
| Myrtaceae     | Syzygyum sp.1           | Rotra             | 5  | 13 | 0.480 | 0.86  |
| Myrtaceae     | Syzygyum sp.2           | Rotra (B)         | 1  | 32 | 0.197 | 0.94  |
| Myrtaceae     | Syzygyum sp.3           | Rotra (M)         | 3  | 3  | 0.270 | -0.64 |
| Myrtaceae     | Syzygyum sp.4           | Rotra (S)         | 5  | 17 | 0.267 | 1.20  |
| Rubiaceae     | Gaertnera sp.1          | Sadoka            | 8  | 18 | 0.395 | 0.34  |
| Rubiaceae     | Gaertnera sp.2          | Sadoka (B)        | 5  | 64 | 0.160 | 0.69  |
| Rubiaceae     | Gaertnera sp.3          | Sadoka (M)        | 8  | 9  | 0.036 | 0.41  |
| Rubiaceae     | Gaertnera sp.4          | Sadoka (S)        | 8  | 19 | 0.095 | 1.07  |
| Rubiaceae     | Gaertnera sp.5          | Sadoka (V)        | 11 | 1  | 0.000 | 1.31  |
| Apocynaceae   | Cerbera manghas         | Samata            | 8  | 14 | 0.010 | 0.85  |
| *             | *                       | Sandrohy          | 12 | 3  | 0.000 | 2.31  |
| Bignoniaceae  | Ophiocolea sp.1         | Sefontsohiy       | 8  | 1  | -     | -     |
| Sapindaceae   | Filicum longifolium     | Sohihy            | 8  | 1  | -     | -     |
| Sapindaceae   | Stadmania sp.2          | Sombotorona       | 3  | 33 | 0.168 | 0.86  |
| Sapindaceae   | Stadmania sp.3          | Sombotorona (B)   | 5  | 1  | 0.000 | 0.77  |
| Sapindaceae   | Stadmania sp.4          | Sombotorona (S)   | 5  | 1  | 0.180 | -0.23 |
| Sapindaceae   | Stadmania sp.1          | Sombotorona fotsy | 3  | 1  | -     | -     |
| Sapindaceae   | Stadmania sp.5          | Sombotorona mena  | 3  | 1  | -     | -     |
| *             | *                       | Tamboho           | 12 | 3  | -     | -     |
| Sapindaceae   | Allophyllus cobe        | Taolambito        | 5  | 15 | 0.166 | 0.97  |
| Anacardiaceae | Micronychia macrophilia | Tarantana         | 3  | 28 | 0.225 | 0.83  |
| Lauraceae     | Cryptocarya sp.1        | Tavolo            | 4  | 32 | 0.238 | 1.06  |
| Lauraceae     | Cryptocarya sp.2        | Tavolo (B)        | 6  | 13 | 0.251 | 0.91  |
| Lauraceae     | Cryptocarya sp.3        | Tavolo (L)        | 6  | 48 | 0.376 | 0.90  |
| Lauraceae     | Cryptocarya sp.4        | Tavolo (M)        | 8  | 4  | -     | -     |
| Lauraceae     | Cryptocarya sp.5        | Tavolo mena       | 5  | 6  | 0.193 | 1.09  |
| Proteaceae    | Dilobeia thouarsii      | Tavolohazo        | 1  | 3  | 0.265 | 0.93  |
| Lauraceae     | Cryptocaria thovenotii  | Tavolopika        | 5  | 52 | 0.248 | 0.84  |
| Rhamnaceae    | Bathiorhamnus louvelii  | Telotritry        | 11 | 3  | 0.090 | 0.57  |

|                 |                              |                    |    |    |       |      |
|-----------------|------------------------------|--------------------|----|----|-------|------|
| *               | *                            | Tendrofoniala      | 3  | 6  | 0.115 | 0.64 |
| *               | *                            | Toava              | 11 | 1  | -     | -    |
| *               | *                            | Tolanakoho         | 11 | 1  | -     | -    |
| Apocynaceae     | Mascarenhasia sp.1           | Tongobitsy         | 11 | 3  | 0.360 | 1.22 |
| Apocynaceae     | Petchia sp.1                 | Tongobororona      | 11 | 1  | 0.000 | 1.40 |
| Melastomaceae   | Dichaetanthera sp.1          | Trotroka           | 6  | 5  | 0.510 | 1.43 |
| Moraceae        | Treculia africana            | Trova              | 3  | 38 | 0.147 | 0.86 |
| Moraceae        | Treculia sp.1                | Trova (B)          | 5  | 19 | 0.152 | 0.64 |
| Moraceae        | Treculia sp.2                | Trova (L)          | 5  | 1  | 0.170 | 1.62 |
| Moraceae        | Trilepisium madagascariense  | Trova (S)          | 3  | 14 | 0.281 | 0.26 |
| Moraceae        | Treculia sp.4                | Trova fotsy        | 8  | 3  | 0.000 | 0.23 |
| Sarcolaenaceae  | Rhodolaena sp.1              | Tsiarinarina       | 3  | 31 | 0.111 | 0.76 |
| Sarcolaenaceae  | Rhodolaena sp.3              | Tsiarinarina (B)   | 5  | 1  | -     | -    |
| Rutaceae        | Zanthoxylum madagascariensis | Tsihanihimposa     | 3  | 6  | 1.078 | 0.57 |
| Oleaceae        | Noronhia grandifolia         | Tsilaitra (B)      | 12 | 1  | -     | -    |
| Melastomataceae | Memecylon sp.1               | Tsimahamasatsokina | 8  | 25 | 0.263 | 0.56 |
| Clusiaceae      | Paramammea megaphylla        | Tsimanotro         | 4  | 4  | 0.180 | 1.30 |
| *               | *                            | Tsinoronoro        | 5  | 13 | 0.211 | 0.80 |
| Moraceae        | Streblus sp.1                | Tsipatika          | 5  | 92 | 0.371 | 0.73 |
| *               | *                            | Unknown            | 8  | 4  | 0.275 | 1.01 |
| Arecaceae       | Ravenea sp.2                 | Vakaka             | 9  | 3  | 0.000 | 1.45 |
| Rubiaceae       | Tarenna sp.1                 | Valanirana         | 6  | 5  | 0.090 | 0.65 |
| Rutaceae        | Vepris leandriana            | Vatolongoala       | 12 | 1  | -     | -    |
| Clusiaceae      | Calophyllum sp.1             | Vintanona          | 3  | 50 | 0.497 | 0.77 |
| Lauraceae       | Cryptocarya sp.9             | Voadambo           | 11 | 1  | -     | -    |
| Euphorbiaceae   | Omphalea oppositifolia       | Voalohakoho        | 8  | 20 | 0.203 | 0.80 |
| Rubiaceae       | Pyrostria sp.1               | Voantalalina       | 8  | 6  | -     | -    |
| Rubiaceae       | Pyrostria sp.2               | Voantalalina (B)   | 3  | 43 | 0.248 | 0.94 |
| Rubiaceae       | Pyrostria sp.3               | Voantalalina (M)   | 8  | 4  | 0.090 | 0.70 |
| Rubiaceae       | Pyrostria sp.4               | Voantalalina (S)   | 5  | 9  | 0.000 | 0.87 |
| Rubiaceae       | Rothmannia sp.3              | Voantalanina       | 8  | 19 | -     | -    |
| Rubiaceae       | Rothmannia sp.1              | Voantalanina (B)   | 8  | 3  | 0.000 | 1.76 |

|               |                       |                  |    |     |       |      |
|---------------|-----------------------|------------------|----|-----|-------|------|
| Rubiaceae     | Rothmannia sp.2       | Voantalanina (M) | 11 | 3   | -     | -    |
| Rubiaceae     | Rothmannia foliacea   | Voantalanina (S) | 11 | 1   | -     | -    |
| Araliaceae    | Polyscias sp.2        | Voantsilana      | 8  | 10  | 0.102 | 0.99 |
| Araliaceae    | Polyscias sp.4        | Voantsilana (B)  | 8  | 3   | 0.000 | 0.42 |
| Araliaceae    | Polyscias sp.6        | Voantsilana (S)  | 8  | 1   | 1.230 | 0.71 |
| Euphorbiaceae | Uapaca louvellii      | Voapaka          | 4  | 160 | 0.552 | 1.00 |
| Euphorbiaceae | Uapaca amplifolia     | Voapaka (B)      | 9  | 5   | 0.273 | 0.42 |
| Moraceae      | Ficus sp.2            | Voara            | 6  | 13  | 0.474 | 0.86 |
| *             | *                     | Voariana         | 12 | 1   | -     | -    |
| Myrtaceae     | Syzygium sp.5         | Voarotra         | 6  | 34  | 0.240 | 0.79 |
| Fabaceae      | Albizia guminifera    | Volomborona      | 1  | 17  | 0.385 | 0.92 |
| *             | bamboo                | Volosy (bamboo)  | 7  | 1   | -     | -    |
| Clusiaceae    | Rheedia dalleizettei  | Vongo            | 5  | 20  | 0.321 | 0.75 |
| Arecaceae     | Dypsis crinata        | Vonitra          | 9  | 52  | 0.177 | 0.73 |
| Malvaceae     | Hildegardia sp.1      | Vonoa            | 7  | 4   | 0.260 | 1.18 |
| Salicaceae    | Homalium sp.1         | Zamalotra        | 7  | 11  | 0.060 | 1.10 |
| Clusiaceae    | Mammea bongo          | Zambo            | 11 | 1   | -     | -    |
| Clusiaceae    | Mammea sp.1           | Zambo (B)        | 11 | 1   | -     | -    |
| Fabaceae      | Dialium unifoliolatum | Zanamena         | 3  | 15  | 0.023 | 0.40 |

**Table C-2.** Sorting by the Malagasy tree name, this table presents RNI Betampona inventory plot summary for 2004 and 2005. For each species in each year, the FORMIND model plant functional type number is listed, as well as mean DBH (cm), minimum DBH (cm), maximum DBH (cm), mean height (m), minimum height (m) and maximum height (m) are listed. Unknown species are denoted with an asterisk. In addition, species that were only measured during one of the years and thus growth could not be calculated were denoted with a dash.

| MalagasyName   | PFT | 2004          |                  |                  |                 |                    |                    | 2005          |                  |                  |                 |                    |                    |
|----------------|-----|---------------|------------------|------------------|-----------------|--------------------|--------------------|---------------|------------------|------------------|-----------------|--------------------|--------------------|
|                |     | Mean DBH (cm) | Minimum DBH (cm) | Maximum DBH (cm) | Mean Height (m) | Minimum Height (m) | Maximum Height (m) | Mean DBH (cm) | Minimum DBH (cm) | Maximum DBH (cm) | Mean Height (m) | Minimum Height (m) | Maximum Height (m) |
| Afobonoa       | 8   | 13.15         | 10.90            | 15.40            | -               | -                  | -                  | -             | -                | -                | 9.89            | 7.95               | 11.82              |
| Afopotsy       | 8   | 11.24         | 5.00             | 24.90            | 12.55           | 6.61               | 16.37              | 14.32         | 5.00             | 25.5             | 10.59           | 4.80               | 16.72              |
| Afopotsy (B)   | 3   | 10.83         | 5.30             | 34.10            | 12.99           | 6.38               | 28.35              | 10.89         | 5.40             | 34.2             | 12.21           | 5.05               | 26.93              |
| Afopotsy (M)   | 8   | -             | -                | -                | 11.68           | 11.68              | 11.68              | 17.50         | 17.50            | 17.5             | -               | -                  | -                  |
| Afopotsy (S)   | 8   | 7.70          | 5.40             | 14.00            | 8.86            | 7.93               | 10.18              | 7.54          | 5.20             | 14.3             | 8.25            | 7.12               | 9.92               |
| Afotrakora     | 3   | 14.54         | 5.30             | 42.40            | 16.55           | 6.62               | 32.93              | 15.82         | 5.40             | 42.9             | 12.64           | 4.65               | 31.68              |
| Akangarano     | 5   | 9.53          | 5.20             | 16.10            | 9.68            | 5.33               | 17.30              | 9.80          | 5.20             | 16.1             | 9.01            | 5.07               | 15.72              |
| Amaninombilahy | 5   | 36.30         | 36.30            | 36.30            | 18.21           | 11.98              | 24.43              | 23.75         | 11.20            | 36.3             | 23.16           | 23.16              | 23.16              |
| Ambona         | 8   | 5.90          | 5.90             | 5.90             | 11.49           | 11.49              | 11.49              | 6.20          | 6.20             | 6.2              | 9.78            | 9.78               | 9.78               |
| Ambonambona    | 3   | 12.79         | 5.10             | 41.50            | 11.98           | 6.21               | 24.29              | 13.08         | 5.10             | 42.3             | 11.57           | 4.76               | 23.47              |

|                 |    |       |       |       |       |       |       |       |       |      |       |       |       |
|-----------------|----|-------|-------|-------|-------|-------|-------|-------|-------|------|-------|-------|-------|
| Ambonambona (B) | 6  | 17.80 | 6.90  | 31.40 | 14.86 | 10.43 | 18.42 | 18.07 | 6.90  | 31.7 | 14.27 | 10.23 | 17.89 |
| Ambora          | 8  | 9.14  | 5.00  | 12.50 | 9.97  | 5.88  | 13.98 | 9.69  | 5.80  | 12.8 | 8.90  | 3.71  | 13.52 |
| Ambora (S)      | 11 | 7.50  | 7.50  | 7.50  | 9.62  | 9.62  | 9.62  | 7.60  | 7.60  | 7.6  | 8.60  | 8.60  | 8.60  |
| Amborambe       | 11 | 6.03  | 5.10  | 7.50  | 4.80  | 4.80  | 4.80  | 6.00  | 6.00  | 6    | 5.16  | 4.12  | 6.30  |
| Amborasa        | 11 | 5.60  | 5.00  | 6.20  | -     | -     | -     | -     | -     | -    | 8.39  | 5.94  | 10.84 |
| Amborasaha      | 8  | 8.53  | 5.40  | 14.40 | 9.34  | 6.06  | 12.60 | 9.07  | 5.70  | 14.5 | 8.31  | 5.81  | 10.76 |
| Ambovitsika     | 8  | 7.51  | 5.20  | 10.40 | 7.87  | 4.64  | 10.15 | 6.98  | 5.00  | 10.5 | 8.03  | 4.98  | 12.68 |
| Ampalirano      | 11 | 5.86  | 5.10  | 6.50  | 5.90  | 3.88  | 7.26  | 5.83  | 5.10  | 6.5  | 5.81  | 3.67  | 7.11  |
| Ampaly          | 9  | 6.68  | 5.20  | 9.10  | 8.60  | 7.09  | 11.19 | 6.90  | 5.80  | 8.5  | 9.00  | 5.10  | 12.55 |
| Andrarazina     | 10 | 8.10  | 8.10  | 8.10  | 11.05 | 11.05 | 11.05 | 8.20  | 8.20  | 8.2  | 10.42 | 10.42 | 10.42 |
| Anivona         | 9  | 7.37  | 0.00  | 17.40 | 7.97  | 6.13  | 9.75  | 15.33 | 13.90 | 17.6 | 7.05  | 1.87  | 14.89 |
| Ankahatra       | 5  | 8.07  | 5.10  | 13.90 | 10.64 | 4.75  | 21.23 | 8.19  | 5.00  | 14.1 | 9.22  | 3.39  | 20.17 |
| Ankahatra (B)   | 11 | 5.87  | 5.20  | 7.10  | 7.79  | 7.20  | 8.25  | 6.33  | 5.30  | 7.4  | 6.60  | 5.42  | 8.01  |
| Antafanala      | 6  | 25.67 | 6.40  | 54.50 | 7.23  | 7.23  | 7.23  | 6.40  | 6.40  | 6.4  | 16.69 | 8.64  | 26.27 |
| Antafara        | 6  | 15.75 | 13.90 | 17.60 | -     | -     | -     | -     | -     | -    | 14.34 | 10.93 | 17.75 |
| Antafarana      | 9  | 5.10  | 5.10  | 5.10  | -     | -     | -     | -     | -     | -    | 2.75  | 2.75  | 2.75  |
| Antafonana      | 6  | 9.68  | 5.40  | 18.90 | 12.35 | 8.70  | 18.04 | 10.15 | 5.70  | 20.4 | 10.77 | 6.06  | 16.02 |
| Antevaratra     | 1  | 14.64 | 5.10  | 75.90 | 15.55 | 5.23  | 44.82 | 15.29 | 5.10  | 75.9 | 14.11 | 5.01  | 42.46 |
| Antevaratra (S) | 11 | 6.80  | 6.80  | 6.80  | -     | -     | -     | -     | -     | -    | 6.92  | 6.92  | 6.92  |
| Antohiravina    | 8  | 8.53  | 5.40  | 11.00 | 11.81 | 8.01  | 13.97 | 8.77  | 5.50  | 11.1 | 10.68 | 6.81  | 12.68 |
| Arina           | 8  | 12.82 | 5.50  | 30.50 | 12.04 | 6.46  | 15.95 | 12.32 | 5.60  | 30.5 | 10.61 | 0.00  | 15.62 |
| Arongaparhihy   | 9  | 28.50 | 28.50 | 28.50 | -     | -     | -     | -     | -     | -    | 14.48 | 14.48 | 14.48 |
| Asina           | 12 | -     | -     | -     | 8.17  | 8.17  | 8.17  | 5.50  | 5.50  | 5.5  | -     | -     | -     |

|                   |    |       |       |       |       |       |       |       |       |      |       |       |       |
|-------------------|----|-------|-------|-------|-------|-------|-------|-------|-------|------|-------|-------|-------|
| Atafanala         | 4  | 16.89 | 6.00  | 40.10 | 12.36 | 6.79  | 23.24 | 17.28 | 6.00  | 40.1 | 11.63 | 5.21  | 21.87 |
| Atamba            | 9  | 7.39  | 5.10  | 8.80  | 8.10  | 4.94  | 14.95 | 7.44  | 5.70  | 8.9  | 7.78  | 4.89  | 14.43 |
| Bararaty          | 5  | 12.18 | 5.20  | 26.90 | 11.86 | 4.98  | 20.57 | 12.98 | 5.20  | 27.3 | 10.55 | 3.49  | 20.04 |
| Drehaethatera     | 11 | 11.80 | 11.80 | 11.80 | -     | -     | -     | -     | -     | -    | 8.68  | 8.68  | 8.68  |
| Fahavalontrazo    | 3  | 10.13 | 6.40  | 14.90 | 13.87 | 9.00  | 17.94 | 10.98 | 6.60  | 14.9 | 12.65 | 6.94  | 22.63 |
| Fahavalotrazana   | 11 | 8.10  | 8.10  | 8.10  | -     | -     | -     | -     | -     | -    | 9.36  | 9.36  | 9.36  |
| Fahavalotrazo (M) | 11 | 6.30  | 6.30  | 6.30  | 6.58  | 6.58  | 6.58  | 6.40  | 6.40  | 6.4  | 5.37  | 5.37  | 5.37  |
| Famelona          | 5  | 11.12 | 5.10  | 25.40 | 12.67 | 5.40  | 21.68 | 13.13 | 5.10  | 25.7 | 10.62 | 5.29  | 20.21 |
| Fandramanana      | 5  | 8.35  | 5.00  | 13.00 | 9.21  | 3.47  | 21.96 | 8.72  | 5.20  | 13.3 | 8.32  | 3.45  | 20.13 |
| Fandrianakanga    | 5  | 20.12 | 5.70  | 37.70 | 14.94 | 8.37  | 20.48 | 21.78 | 5.70  | 39.1 | 12.52 | 2.49  | 19.72 |
| Fanempoka         | 4  | 49.90 | 49.90 | 49.90 | 30.81 | 30.81 | 30.81 | 50.50 | 50.50 | 50.5 | 29.08 | 29.08 | 29.08 |
| Fanitokakolahy    | 11 | 7.77  | 6.10  | 9.40  | 8.77  | 8.37  | 9.17  | 8.85  | 8.20  | 9.5  | 6.77  | 5.44  | 8.28  |
| Fanzana           | 8  | 10.72 | 5.00  | 46.80 | 5.31  | 1.83  | 10.93 | 10.32 | 5.00  | 33.5 | 5.07  | 0.00  | 16.46 |
| Fatora            | 11 | 5.73  | 5.20  | 6.20  | 9.01  | 9.01  | 9.01  | 6.30  | 6.30  | 6.3  | 7.58  | 5.95  | 9.65  |
| Fitoravina        | 12 | 5.30  | 5.00  | 5.80  | 7.39  | 4.88  | 8.44  | 5.43  | 5.20  | 5.8  | 7.45  | 5.36  | 8.80  |
| Gavoala           | 9  | 11.20 | 8.40  | 15.00 | 12.30 | 5.92  | 15.50 | 11.43 | 8.40  | 15.7 | 11.65 | 5.92  | 14.92 |
| Gavombazaha       | 12 | 7.43  | 7.00  | 8.20  | -     | -     | -     | -     | -     | -    | 5.76  | 4.49  | 7.83  |
| Guavo             | 10 | 8.35  | 8.10  | 8.60  | 11.30 | 9.95  | 12.65 | 8.40  | 8.10  | 8.7  | 10.60 | 8.59  | 12.61 |
| Hafomena          | 7  | 11.91 | 6.20  | 27.10 | 12.75 | 6.59  | 21.26 | 11.91 | 5.10  | 27.1 | 12.26 | 5.79  | 20.28 |
| Hafotra           | 10 | 9.50  | 6.20  | 12.80 | 9.30  | 6.04  | 11.06 | 9.57  | 5.20  | 12.8 | 9.72  | 9.14  | 10.30 |
| Harina            | 5  | 22.20 | 22.20 | 22.20 | 19.25 | 19.25 | 19.25 | 22.20 | 22.20 | 22.2 | 19.51 | 19.51 | 19.51 |
| Harongaparhihy    | 6  | 42.60 | 42.60 | 42.60 | -     | -     | -     | -     | -     | -    | 19.06 | 19.06 | 19.06 |
| Hasina            | 8  | 8.79  | 0.00  | 21.00 | 6.66  | 3.71  | 8.50  | 6.97  | 5.80  | 8.4  | 7.27  | 2.86  | 19.01 |

|                 |    |       |       |       |       |       |       |       |       |      |       |       |       |
|-----------------|----|-------|-------|-------|-------|-------|-------|-------|-------|------|-------|-------|-------|
| Hasina (B)      | 9  | 10.44 | 5.20  | 20.90 | 5.64  | 1.10  | 10.42 | 9.82  | 5.10  | 21.3 | 5.26  | 0.94  | 10.14 |
| Hasina (M)      | 11 | 6.97  | 5.00  | 9.60  | 7.03  | 4.46  | 9.45  | 6.95  | 5.20  | 9.6  | 6.48  | 3.10  | 10.48 |
| Hasina (S)      | 8  | 7.93  | 5.80  | 9.80  | 8.46  | 6.01  | 14.27 | 8.13  | 5.80  | 10.5 | 8.01  | 5.52  | 13.91 |
| Hasy            | 9  | 29.00 | 29.00 | 29.00 | 15.89 | 15.89 | 15.89 | 29.30 | 29.30 | 29.3 | 14.82 | 14.82 | 14.82 |
| Havolena        | 5  | 24.80 | 24.80 | 24.80 | -     | -     | -     | -     | -     | -    | 17.40 | 17.40 | 17.40 |
| Hazinina        | 1  | 11.69 | 5.20  | 60.80 | 16.91 | 5.87  | 46.43 | 17.33 | 5.70  | 61.6 | 12.54 | 5.65  | 44.48 |
| Hazinina (B)    | 1  | 10.26 | 5.10  | 35.30 | 11.08 | 2.55  | 37.17 | 10.32 | 5.10  | 35.4 | 9.98  | 0.00  | 36.47 |
| Hazinina (S)    | 3  | 11.34 | 5.00  | 43.40 | 11.97 | 4.41  | 24.98 | 11.38 | 5.10  | 43.6 | 10.44 | 0.00  | 23.96 |
| Hazoambo        | 1  | 19.62 | 5.50  | 61.20 | 16.70 | 8.53  | 27.12 | 17.57 | 5.50  | 40   | 16.86 | 6.89  | 33.55 |
| Hazoambo (B)    | 1  | 14.90 | 14.90 | 14.90 | 19.33 | 19.33 | 19.33 | 14.90 | 14.90 | 14.9 | 17.76 | 17.76 | 17.76 |
| Hazoambomena    | 5  | 19.45 | 16.20 | 22.70 | -     | -     | -     | -     | -     | -    | 12.30 | 7.19  | 17.41 |
| Hazoharaka      | 3  | 8.67  | 5.70  | 14.30 | 8.80  | 8.80  | 8.80  | 6.10  | 6.10  | 6.1  | 7.38  | 6.55  | 8.48  |
| Hazomafana      | 8  | 15.25 | 5.00  | 33.00 | 10.44 | 7.51  | 16.11 | 9.33  | 5.00  | 17.9 | 10.07 | 5.31  | 14.66 |
| Hazomainty      | 5  | 8.65  | 5.00  | 23.10 | 10.66 | 4.34  | 23.21 | 8.86  | 5.10  | 23.1 | 9.52  | 3.02  | 22.25 |
| Hazomainty (M)  | 11 | 6.53  | 5.10  | 7.80  | 7.13  | 6.08  | 8.17  | 7.90  | 7.00  | 8.8  | 6.16  | 5.63  | 6.71  |
| Hazomainty (S)  | 5  | 5.80  | 5.80  | 5.80  | -     | -     | -     | -     | -     | -    | 8.56  | 8.56  | 8.56  |
| Hazomainty (VL) | 8  | 7.60  | 7.40  | 7.80  | 11.75 | 10.27 | 13.23 | 7.65  | 7.50  | 7.8  | 10.24 | 7.70  | 12.77 |
| Hazomalany      | 5  | 13.63 | 5.30  | 42.50 | 14.72 | 8.42  | 19.14 | 18.05 | 5.10  | 44.5 | 10.34 | 1.39  | 18.12 |
| Hazomalany (B)  | 3  | 9.32  | 5.10  | 25.50 | 10.54 | 2.41  | 25.42 | 9.57  | 5.10  | 25.7 | 9.49  | 2.12  | 24.47 |
| Hazomalany (M)  | 8  | 10.25 | 6.60  | 14.10 | 13.96 | 13.96 | 13.96 | 14.20 | 14.20 | 14.2 | 9.81  | 7.46  | 13.56 |
| Hazomalany (S)  | 5  | 12.97 | 5.10  | 24.50 | 13.55 | 6.31  | 17.73 | 13.12 | 5.20  | 24.7 | 12.58 | 5.88  | 17.36 |
| Hazomamiala     | 3  | 12.54 | 5.80  | 22.10 | 14.09 | 6.73  | 24.18 | 12.80 | 5.80  | 22.4 | 13.39 | 4.98  | 23.11 |
| Hazomamiala (B) | 11 | 7.00  | 7.00  | 7.00  | 6.19  | 6.19  | 6.19  | 7.10  | 7.10  | 7.1  | 4.45  | 4.45  | 4.45  |



|                   |    |       |       |       |       |       |       |       |      |      |       |       |       |
|-------------------|----|-------|-------|-------|-------|-------|-------|-------|------|------|-------|-------|-------|
| Hazomamy          | 5  | 10.96 | 5.10  | 26.10 | 12.46 | 7.30  | 19.24 | 11.21 | 5.10 | 26.7 | 11.80 | 6.76  | 18.84 |
| Hazombarorona     | 4  | 11.42 | 5.00  | 32.90 | 12.03 | 5.01  | 28.86 | 12.44 | 5.40 | 33.8 | 10.69 | 0.00  | 26.59 |
| Hazombarorona (M) | 6  | 16.30 | 16.30 | 16.30 | -     | -     | -     | -     | -    | -    | 13.33 | 13.33 | 13.33 |
| Hazombato         | 3  | 17.03 | 5.10  | 30.10 | 14.87 | 6.31  | 32.79 | 14.62 | 5.20 | 27.5 | 14.24 | 6.13  | 30.85 |
| Hazomborona       | 2  | 7.80  | 6.30  | 9.30  | 4.23  | 0.00  | 8.46  | 7.30  | 7.30 | 7.3  | 12.83 | 8.37  | 17.28 |
| Hazomitovo        | 9  | 6.85  | 5.00  | 9.80  | 7.24  | 3.77  | 10.43 | 6.75  | 5.20 | 9.8  | 7.34  | 6.41  | 9.65  |
| Hazondomoina      | 3  | 42.50 | 42.50 | 42.50 | -     | -     | -     | -     | -    | -    | 28.02 | 28.02 | 28.02 |
| Hazontoho         | 8  | 9.76  | 5.10  | 19.70 | 9.00  | 4.28  | 15.58 | 9.05  | 5.10 | 19.7 | 8.17  | 4.22  | 14.44 |
| Hazontoho (B)     | 8  | 7.93  | 5.00  | 13.50 | 9.58  | 6.70  | 12.95 | 8.13  | 5.00 | 13.6 | 8.48  | 5.87  | 10.59 |
| Hazontoho (M)     | 8  | 5.60  | 5.60  | 5.60  | 6.27  | 6.27  | 6.27  | 5.60  | 5.60 | 5.6  | 6.12  | 6.12  | 6.12  |
| Hazontoho (S)     | 8  | 5.00  | 5.00  | 5.00  | 7.54  | 4.34  | 10.74 | 5.50  | 5.10 | 5.9  | 4.50  | 4.50  | 4.50  |
| Hazontoho mena    | 8  | 6.65  | 5.00  | 9.90  | -     | -     | -     | -     | -    | -    | 8.82  | 4.67  | 13.36 |
| Hazontoho potsy   | 8  | 10.40 | 9.70  | 11.10 | -     | -     | -     | -     | -    | -    | 8.88  | 7.48  | 10.28 |
| Hazotoko fotsy    | 11 | 5.55  | 5.20  | 5.90  | -     | -     | -     | -     | -    | -    | 8.51  | 7.28  | 9.73  |
| Hazotsiariana     | 8  | 19.83 | 8.10  | 35.90 | -     | -     | -     | -     | -    | -    | 9.01  | 5.48  | 13.67 |
| Hazovoangy        | 6  | 10.14 | 5.00  | 24.10 | 10.94 | 1.09  | 18.97 | 10.65 | 5.30 | 24.7 | 9.16  | 0.00  | 17.77 |
| Hazovoangy (S)    | 9  | 7.78  | 5.20  | 10.40 | -     | -     | -     | -     | -    | -    | 10.00 | 6.47  | 13.93 |
| Hazovola          | 1  | 22.07 | 7.30  | 92.30 | 17.21 | 6.34  | 33.08 | 22.57 | 6.90 | 94.6 | 15.10 | 0.00  | 31.35 |
| Hitsika           | 8  | 5.90  | 5.00  | 6.80  | 9.30  | 9.30  | 9.30  | 5.20  | 5.20 | 5.2  | 4.59  | 0.00  | 9.17  |
| Hompa             | 5  | 10.60 | 6.10  | 15.10 | 13.72 | 10.54 | 16.89 | 10.70 | 6.30 | 15.1 | 12.62 | 8.50  | 16.73 |
| Kafe              | 12 | 6.73  | 5.00  | 9.50  | -     | -     | -     | -     | -    | -    | 5.76  | 2.84  | 8.46  |
| Kafeala           | 9  | 7.71  | 5.00  | 11.70 | 9.05  | 7.27  | 15.41 | 7.82  | 5.70 | 13   | 8.58  | 5.05  | 14.23 |
| Kisaka            | 3  | 32.35 | 7.50  | 97.50 | 16.71 | 8.84  | 31.34 | 32.40 | 7.40 | 97.5 | 15.67 | 7.43  | 31.34 |

|                |    |       |      |       |       |       |       |       |       |      |       |      |       |
|----------------|----|-------|------|-------|-------|-------|-------|-------|-------|------|-------|------|-------|
| Lalona         | 1  | 30.65 | 5.80 | 95.20 | 22.90 | 7.10  | 44.93 | 37.43 | 6.10  | 95.2 | 18.62 | 6.16 | 44.50 |
| Lalotona       | 1  | 13.64 | 5.00 | 45.10 | 13.25 | 2.63  | 33.01 | 14.22 | 5.20  | 45.1 | 12.15 | 3.03 | 31.23 |
| Lambafo        | 12 | 9.40  | 9.40 | 9.40  | -     | -     | -     | -     | -     | -    | 7.58  | 7.58 | 7.58  |
| Lazalaza       | 9  | 8.27  | 5.00 | 16.40 | 8.07  | 4.35  | 13.10 | 7.68  | 5.00  | 14.2 | 7.20  | 3.45 | 12.49 |
| Lendena        | 8  | 8.33  | 5.40 | 12.30 | 8.96  | 6.78  | 11.49 | 8.40  | 5.40  | 12.4 | 7.73  | 5.22 | 11.28 |
| Longotra       | 1  | 22.41 | 6.20 | 51.30 | 17.09 | 5.92  | 45.06 | 23.32 | 6.20  | 55   | 16.31 | 7.82 | 42.65 |
| Longotra (B)   | 8  | 6.20  | 6.20 | 6.20  | 9.25  | 9.25  | 9.25  | 6.50  | 6.50  | 6.5  | 8.57  | 8.57 | 8.57  |
| Longotra fotsy | 5  | 10.86 | 5.10 | 16.00 | -     | -     | -     | -     | -     | -    | 11.11 | 3.58 | 16.66 |
| Longotra mena  | 8  | 6.15  | 5.20 | 7.10  | -     | -     | -     | -     | -     | -    | 7.01  | 5.68 | 8.34  |
| Maimboloha     | 9  | 12.25 | 5.00 | 19.50 | -     | -     | -     | -     | -     | -    | 7.33  | 4.30 | 10.35 |
| Makaranana     | 10 | 6.93  | 5.00 | 9.70  | 8.54  | 7.16  | 10.38 | 6.98  | 5.10  | 9.8  | 7.33  | 5.99 | 8.84  |
| Mamoalava      | 8  | 5.98  | 5.00 | 7.40  | 9.21  | 6.79  | 14.41 | 6.34  | 5.00  | 7.9  | 8.77  | 5.62 | 13.17 |
| Mampay         | 3  | 10.29 | 5.10 | 27.00 | 11.79 | 5.29  | 18.73 | 11.06 | 5.90  | 23.2 | 10.72 | 5.17 | 17.93 |
| Maporia        | 11 | 5.60  | 5.60 | 5.60  | -     | -     | -     | -     | -     | -    | 5.78  | 5.78 | 5.78  |
| Marakoditra    | 3  | 9.77  | 5.20 | 17.50 | 12.15 | 6.52  | 18.53 | 10.38 | 5.40  | 17.7 | 11.07 | 6.21 | 17.85 |
| Maroando       | 8  | 8.04  | 5.00 | 44.80 | 8.40  | 5.86  | 13.96 | 7.02  | 5.10  | 15.1 | 7.50  | 1.02 | 26.98 |
| Menahihy       | 5  | 8.57  | 5.00 | 21.50 | 9.84  | 6.47  | 12.83 | 11.11 | 6.30  | 19   | 8.38  | 3.66 | 17.58 |
| Menahihy (B)   | 5  | 9.39  | 5.00 | 25.40 | 10.66 | 6.06  | 16.86 | 9.14  | 5.20  | 25.7 | 9.70  | 4.64 | 15.87 |
| Menahihy (M)   | 8  | 6.90  | 6.90 | 6.90  | 7.79  | 7.79  | 7.79  | 7.40  | 7.40  | 7.4  | 8.82  | 8.82 | 8.82  |
| Menahihy (S)   | 8  | 7.43  | 5.00 | 20.10 | 9.99  | 4.94  | 14.98 | 7.79  | 5.00  | 32.2 | 9.33  | 4.88 | 14.08 |
| Menavozona     | 9  | 6.82  | 0.00 | 18.50 | 11.75 | 10.45 | 13.05 | 17.90 | 16.70 | 19.1 | 7.81  | 5.85 | 11.71 |
| Molanga        | 10 | 8.10  | 5.10 | 11.00 | 9.86  | 7.75  | 13.16 | 8.47  | 5.10  | 11.9 | 9.50  | 7.66 | 12.63 |
| Molopangady    | 3  | 11.61 | 5.50 | 32.30 | 9.25  | 9.25  | 9.25  | 6.40  | 6.40  | 6.4  | 11.56 | 1.96 | 29.24 |

|                       |    |       |       |       |       |       |       |       |       |      |       |       |       |
|-----------------------|----|-------|-------|-------|-------|-------|-------|-------|-------|------|-------|-------|-------|
| Molopangady (S)       | 5  | 12.80 | 12.80 | 12.80 | -     | -     | -     | -     | -     | -    | 12.57 | 12.57 | 12.57 |
| Molopangady fotsy     | 3  | 15.84 | 5.00  | 50.20 | 13.76 | 6.69  | 25.94 | 15.96 | 5.10  | 50.9 | 12.51 | 6.21  | 24.32 |
| Molopangady fotsy (S) | 5  | 7.50  | 7.50  | 7.50  | 10.17 | 10.17 | 10.17 | 8.20  | 8.20  | 8.2  | 9.00  | 9.00  | 9.00  |
| Molopangady mena      | 3  | 33.12 | 7.20  | 85.00 | 19.95 | 12.98 | 24.35 | 41.03 | 7.40  | 85.4 | 16.50 | 9.40  | 22.36 |
| Mongy                 | 12 | 6.50  | 6.50  | 6.50  | 5.04  | 4.04  | 6.03  | 6.30  | 6.10  | 6.5  | 4.06  | 4.06  | 4.06  |
| Nanto                 | 1  | 41.04 | 5.90  | 85.20 | 22.88 | 11.18 | 37.71 | 41.19 | 5.90  | 85.5 | 21.67 | 11.10 | 35.48 |
| Nanto (B)             | 3  | 9.10  | 9.10  | 9.10  | 11.63 | 11.63 | 11.63 | 9.10  | 9.10  | 9.1  | 8.96  | 8.96  | 8.96  |
| Nanto (M)             | 5  | 6.60  | 6.60  | 6.60  | 8.89  | 8.89  | 8.89  | 6.50  | 6.50  | 6.5  | 8.05  | 8.05  | 8.05  |
| Nanto (S)             | 4  | 16.16 | 5.80  | 39.70 | 14.22 | 6.64  | 31.38 | 15.61 | 5.70  | 39.7 | 13.66 | 5.40  | 29.60 |
| Nanto (VL)            | 5  | 12.70 | 8.50  | 16.90 | 13.90 | 11.68 | 16.12 | 12.70 | 8.50  | 16.9 | 13.40 | 11.58 | 15.22 |
| Oditrovny             | 8  | 10.90 | 7.70  | 13.80 | 10.25 | 9.21  | 11.28 | 12.65 | 11.20 | 14.1 | 10.49 | 9.05  | 11.73 |
| Ombary                | 11 | 6.00  | 6.00  | 6.00  | -     | -     | -     | -     | -     | -    | 3.88  | 3.88  | 3.88  |
| Ompa                  | 6  | 19.17 | 8.90  | 30.30 | -     | -     | -     | -     | -     | -    | 12.29 | 2.89  | 19.82 |
| Ovana                 | 9  | 6.19  | 5.00  | 9.30  | 8.48  | 5.72  | 12.64 | 6.23  | 5.00  | 8.5  | 7.74  | 0.85  | 12.58 |
| Ovatsarorona          | 12 | 25.20 | 25.20 | 25.20 | -     | -     | -     | -     | -     | -    | 5.27  | 5.27  | 5.27  |
| Ovobola fotsy         | 5  | 14.49 | 10.80 | 20.40 | 13.04 | 6.70  | 16.28 | 14.49 | 10.80 | 20.4 | 12.13 | 5.12  | 15.17 |
| Ovodafa               | 9  | 11.92 | 8.20  | 15.30 | 7.96  | 4.57  | 10.75 | 12.15 | 8.60  | 15.5 | 7.29  | 3.67  | 10.43 |
| Ovotahitso            | 4  | 18.25 | 7.00  | 27.00 | 16.27 | 3.28  | 26.01 | 21.66 | 12.10 | 27   | 13.32 | 3.08  | 24.80 |
| Pandanus              | 8  | 6.79  | 5.20  | 18.30 | 6.49  | 3.31  | 9.50  | 7.03  | 5.20  | 18.4 | 5.59  | 2.07  | 10.94 |
| Ramy                  | 1  | 22.86 | 5.20  | 77.60 | 17.37 | 6.51  | 39.68 | 23.96 | 5.20  | 77.8 | 16.00 | 4.55  | 37.24 |
| Ramy (B)              | 3  | 17.93 | 6.20  | 40.20 | 14.90 | 9.36  | 20.44 | 24.10 | 7.40  | 40.8 | 10.91 | 5.99  | 18.72 |
| Rara                  | 3  | 10.93 | 5.20  | 43.90 | 12.35 | 6.39  | 26.18 | 11.70 | 5.20  | 43.9 | 10.84 | 5.30  | 24.53 |
| Rara fotsy            | 5  | 21.00 | 21.00 | 21.00 | -     | -     | -     | -     | -     | -    | 23.02 | 23.02 | 23.02 |

|                   |    |       |       |       |       |       |       |       |       |      |       |       |       |
|-------------------|----|-------|-------|-------|-------|-------|-------|-------|-------|------|-------|-------|-------|
| Rara mena         | 8  | 19.90 | 19.90 | 19.90 | -     | -     | -     | -     | -     | -    | 15.56 | 15.56 | 15.56 |
| Ravinala          | 2  | 23.84 | 0.00  | 47.90 | 18.07 | 3.51  | 36.72 | 30.46 | 0.00  | 46.1 | 15.20 | 0.00  | 36.65 |
| Robary            | 6  | 13.18 | 5.40  | 23.40 | -     | -     | -     | -     | -     | -    | 13.42 | 11.50 | 18.80 |
| Rodambo           | 12 | 8.15  | 7.30  | 9.00  | -     | -     | -     | -     | -     | -    | 6.97  | 6.67  | 7.26  |
| Romendafa         | 5  | 28.30 | 8.80  | 47.80 | 21.00 | 21.00 | 21.00 | 48.30 | 48.30 | 48.3 | 13.35 | 7.65  | 19.04 |
| Rotra             | 5  | 12.93 | 5.10  | 31.10 | 12.15 | 8.08  | 18.23 | 15.22 | 6.70  | 31.3 | 10.48 | 3.76  | 16.99 |
| Rotra (B)         | 1  | 15.17 | 5.00  | 62.20 | 13.56 | 5.71  | 46.88 | 15.57 | 5.10  | 62.4 | 12.59 | 5.33  | 45.59 |
| Rotra (M)         | 3  | 11.85 | 5.80  | 17.90 | 8.43  | 8.43  | 8.43  | 6.10  | 6.10  | 6.1  | 10.31 | 9.14  | 11.47 |
| Rotra (S)         | 5  | 11.33 | 5.10  | 28.70 | 11.98 | 6.17  | 20.56 | 11.63 | 5.50  | 29.6 | 10.65 | 5.61  | 18.69 |
| Sadoka            | 8  | 6.96  | 5.10  | 12.00 | 10.66 | 10.12 | 11.19 | 10.55 | 8.60  | 12.5 | 7.50  | 5.43  | 10.63 |
| Sadoka (B)        | 5  | 7.86  | 5.00  | 14.00 | 8.91  | 5.42  | 17.27 | 7.98  | 5.10  | 14.2 | 8.46  | 3.52  | 15.80 |
| Sadoka (M)        | 8  | 7.41  | 5.20  | 9.80  | 9.07  | 6.93  | 13.55 | 7.74  | 6.20  | 9.8  | 8.52  | 6.51  | 13.14 |
| Sadoka (S)        | 8  | 7.33  | 5.10  | 13.90 | 8.15  | 4.64  | 11.81 | 7.43  | 5.10  | 13.9 | 6.95  | 4.12  | 11.13 |
| Sadoka (V)        | 11 | 6.90  | 6.90  | 6.90  | 8.78  | 8.78  | 8.78  | 6.90  | 6.90  | 6.9  | 7.32  | 7.32  | 7.32  |
| Samata            | 8  | 8.04  | 5.40  | 11.00 | 10.08 | 6.51  | 13.84 | 8.33  | 5.40  | 11   | 8.58  | 4.97  | 13.15 |
| Sandrohy          | 12 | 15.20 | 14.20 | 16.20 | 7.46  | 7.46  | 7.46  | 16.20 | 16.20 | 16.2 | 6.53  | 4.91  | 8.14  |
| Sefontsohihy      | 8  | 27.50 | 27.50 | 27.50 | -     | -     | -     | -     | -     | -    | 11.88 | 11.88 | 11.88 |
| Sohihy            | 8  | 10.30 | 10.30 | 10.30 | -     | -     | -     | -     | -     | -    | 11.73 | 11.73 | 11.73 |
| Sombotorona       | 3  | 11.41 | 5.20  | 34.30 | 12.93 | 5.99  | 21.35 | 11.84 | 5.20  | 34.5 | 11.73 | 5.64  | 20.53 |
| Sombotorona (B)   | 5  | 6.50  | 6.50  | 6.50  | 9.27  | 9.27  | 9.27  | 6.50  | 6.50  | 6.5  | 8.42  | 8.42  | 8.42  |
| Sombotorona (S)   | 5  | 11.50 | 11.50 | 11.50 | 8.77  | 8.77  | 8.77  | 11.70 | 11.70 | 11.7 | 9.02  | 9.02  | 9.02  |
| Sombotorona fotsy | 3  | 28.50 | 28.50 | 28.50 | -     | -     | -     | -     | -     | -    | 19.94 | 19.94 | 19.94 |
| Sombotorona mena  | 3  | 30.00 | 30.00 | 30.00 | -     | -     | -     | -     | -     | -    | 21.39 | 21.39 | 21.39 |

|               |    |       |       |       |       |       |       |       |       |      |       |       |       |
|---------------|----|-------|-------|-------|-------|-------|-------|-------|-------|------|-------|-------|-------|
| Tamboho       | 12 | 0.00  | 0.00  | 0.00  | -     | -     | -     | -     | -     | -    | 3.45  | 3.37  | 3.52  |
| Taolambito    | 5  | 11.93 | 5.40  | 38.50 | 6.64  | 0.00  | 18.30 | 9.87  | 5.40  | 18.5 | 9.82  | 3.33  | 17.33 |
| Tarantana     | 3  | 21.73 | 5.30  | 57.50 | 15.80 | 7.30  | 24.04 | 23.10 | 5.40  | 60.1 | 14.20 | 5.65  | 23.38 |
| Tavolo        | 4  | 9.58  | 5.00  | 18.00 | 13.55 | 5.60  | 18.99 | 11.54 | 5.50  | 18.3 | 11.13 | 3.99  | 22.97 |
| Tavolo (B)    | 6  | 12.34 | 5.80  | 24.80 | 12.57 | 7.93  | 19.10 | 12.40 | 5.80  | 25.2 | 10.97 | 7.31  | 18.07 |
| Tavolo (L)    | 6  | 10.26 | 5.10  | 25.20 | 12.85 | 7.30  | 21.32 | 10.74 | 5.10  | 27.5 | 11.89 | 4.82  | 21.27 |
| Tavolo (M)    | 8  | 11.23 | 7.50  | 14.80 | -     | -     | -     | -     | -     | -    | 10.10 | 7.68  | 13.55 |
| Tavolo mena   | 5  | 16.68 | 8.90  | 36.30 | 14.46 | 9.80  | 17.95 | 17.58 | 9.40  | 36.4 | 12.78 | 8.33  | 16.72 |
| Tavolohazo    | 1  | 25.25 | 17.30 | 33.20 | 29.72 | 18.51 | 40.92 | 25.55 | 17.90 | 33.2 | 28.65 | 17.62 | 39.68 |
| Tavolopika    | 5  | 10.87 | 5.50  | 27.20 | 12.96 | 7.14  | 21.97 | 11.39 | 5.70  | 27.2 | 11.76 | 4.45  | 21.01 |
| Telotritry    | 11 | 6.40  | 5.80  | 7.00  | 7.51  | 7.20  | 7.82  | 6.50  | 6.00  | 7    | 6.86  | 6.22  | 7.50  |
| Tendrofoniala | 3  | 23.45 | 5.70  | 34.20 | 16.41 | 6.60  | 27.06 | 20.76 | 6.00  | 34.2 | 16.47 | 6.48  | 25.25 |
| Toava         | 11 | 17.50 | 17.50 | 17.50 | -     | -     | -     | -     | -     | -    | 9.84  | 9.84  | 9.84  |
| Tolanakoho    | 11 | 7.00  | 7.00  | 7.00  | -     | -     | -     | -     | -     | -    | 5.54  | 5.54  | 5.54  |
| Tongobitsy    | 11 | 5.00  | 5.00  | 5.00  | 8.76  | 8.58  | 8.93  | 5.40  | 5.40  | 5.4  | 7.41  | 6.65  | 8.17  |
| Tongobororona | 11 | 6.40  | 6.40  | 6.40  | 7.93  | 7.93  | 7.93  | 6.40  | 6.40  | 6.4  | 6.40  | 6.40  | 6.40  |
| Trotroka      | 6  | 24.18 | 5.10  | 53.00 | 13.42 | 8.37  | 22.88 | 23.83 | 5.40  | 53.1 | 12.16 | 7.05  | 20.20 |
| Trova         | 3  | 10.35 | 5.00  | 53.00 | 12.16 | 6.40  | 26.93 | 11.94 | 5.10  | 53   | 11.03 | 5.82  | 26.85 |
| Trova (B)     | 5  | 11.13 | 5.30  | 24.70 | 12.28 | 3.92  | 21.48 | 11.62 | 5.30  | 24.9 | 11.46 | 3.78  | 20.47 |
| Trova (L)     | 5  | 10.00 | 10.00 | 10.00 | 16.39 | 16.39 | 16.39 | 10.20 | 10.20 | 10.2 | 14.52 | 14.52 | 14.52 |
| Trova (S)     | 3  | 14.78 | 5.20  | 37.90 | 13.57 | 5.81  | 24.05 | 15.69 | 5.20  | 39   | 12.33 | 5.49  | 27.36 |
| Trova fotsy   | 8  | 6.30  | 6.30  | 6.30  | 9.59  | 9.24  | 9.94  | 6.30  | 6.30  | 6.3  | 9.34  | 8.96  | 9.72  |
| Tsiarinarina  | 3  | 13.05 | 5.10  | 52.20 | 12.54 | 5.52  | 27.10 | 14.43 | 5.30  | 52.2 | 10.12 | 0.00  | 26.74 |

|                    |    |       |       |       |       |       |       |       |       |      |       |       |       |
|--------------------|----|-------|-------|-------|-------|-------|-------|-------|-------|------|-------|-------|-------|
| Tsiarinarina (B)   | 5  | 5.70  | 5.70  | 5.70  | -     | -     | -     | -     | -     | -    | 14.86 | 14.86 | 14.86 |
| Tsihanihimposa     | 3  | 37.82 | 20.60 | 60.30 | 19.62 | 15.03 | 25.47 | 41.13 | 20.80 | 64.1 | 17.06 | 9.44  | 24.50 |
| Tsilaitra (B)      | 12 | 5.00  | 5.00  | 5.00  | -     | -     | -     | -     | -     | -    | 5.26  | 5.26  | 5.26  |
| Tsimahamasatsokina | 8  | 7.95  | 5.20  | 17.20 | 10.19 | 5.62  | 14.58 | 8.18  | 5.30  | 16.7 | 9.16  | 4.45  | 14.21 |
| Tsimanotro         | 4  | 28.27 | 5.00  | 69.00 | 27.26 | 27.26 | 27.26 | 69.20 | 69.20 | 69.2 | 17.80 | 11.27 | 25.82 |
| Tsinoronoro        | 5  | 9.29  | 5.10  | 23.20 | 9.41  | 3.75  | 17.46 | 9.97  | 5.20  | 23.2 | 8.36  | 3.70  | 15.98 |
| Tsipatika          | 5  | 8.72  | 5.00  | 31.60 | 9.97  | 4.22  | 22.83 | 9.46  | 5.10  | 42.7 | 8.39  | 0.00  | 19.83 |
| Unknown            | 8  | 13.93 | 6.80  | 21.00 | 10.73 | 7.08  | 14.38 | 10.70 | 6.80  | 14.6 | 8.68  | 6.22  | 13.02 |
| Vakaka             | 9  | 10.00 | 0.00  | 20.00 | 11.99 | 11.99 | 11.99 | 20.00 | 20.00 | 20   | 7.95  | 5.58  | 10.31 |
| Valanirana         | 6  | 9.87  | 7.20  | 14.10 | 9.95  | 8.10  | 11.29 | 10.50 | 7.20  | 14.3 | 7.62  | 4.92  | 11.24 |
| Vatolongoala       | 12 | 12.00 | 12.00 | 12.00 | -     | -     | -     | -     | -     | -    | 4.78  | 4.78  | 4.78  |
| Vintanona          | 3  | 13.01 | 5.00  | 39.60 | 12.87 | 3.49  | 31.02 | 13.02 | 5.00  | 39.7 | 11.99 | 3.45  | 29.72 |
| Voadambo           | 11 | 8.00  | 8.00  | 8.00  | -     | -     | -     | -     | -     | -    | 5.72  | 5.72  | 5.72  |
| Voalohakoho        | 8  | 10.69 | 5.80  | 20.30 | 8.67  | 5.27  | 11.88 | 10.58 | 5.40  | 20.5 | 7.95  | 4.57  | 11.64 |
| Voantalalina       | 8  | 10.84 | 5.90  | 25.80 | -     | -     | -     | -     | -     | -    | 8.66  | 6.37  | 12.08 |
| Voantalalina (B)   | 3  | 10.24 | 5.10  | 45.00 | 10.47 | 5.87  | 26.79 | 10.46 | 5.10  | 45.2 | 9.40  | 4.83  | 25.01 |
| Voantalalina (M)   | 8  | 10.20 | 6.10  | 15.90 | 8.32  | 5.41  | 11.22 | 11.10 | 6.10  | 16.1 | 8.39  | 5.40  | 10.09 |
| Voantalalina (S)   | 5  | 13.14 | 5.50  | 34.90 | 10.83 | 7.92  | 19.23 | 7.47  | 5.50  | 10.5 | 9.77  | 6.91  | 15.00 |
| Voantalanina       | 8  | 8.25  | 5.00  | 15.80 | -     | -     | -     | -     | -     | -    | 8.46  | 4.71  | 12.68 |
| Voantalanina (B)   | 8  | 6.95  | 6.40  | 7.50  | 8.44  | 8.44  | 8.44  | 6.40  | 6.40  | 6.4  | 7.86  | 6.35  | 9.36  |
| Voantalanina (M)   | 11 | 5.80  | 5.10  | 6.50  | -     | -     | -     | -     | -     | -    | 7.19  | 6.00  | 8.37  |
| Voantalanina (S)   | 11 | 5.00  | 5.00  | 5.00  | -     | -     | -     | -     | -     | -    | 6.20  | 6.20  | 6.20  |
| Voantsilana        | 8  | 8.98  | 5.00  | 18.10 | 10.27 | 7.69  | 13.69 | 8.85  | 5.00  | 18.3 | 8.74  | 4.64  | 11.90 |

|                 |    |       |      |       |       |       |       |       |      |      |       |       |       |
|-----------------|----|-------|------|-------|-------|-------|-------|-------|------|------|-------|-------|-------|
| Voantsilana (B) | 8  | 5.20  | 5.20 | 5.20  | 7.24  | 6.00  | 8.47  | 5.45  | 5.20 | 5.7  | 5.54  | 5.54  | 5.54  |
| Voantsilana (S) | 8  | 7.50  | 7.50 | 7.50  | 9.21  | 9.21  | 9.21  | 8.90  | 8.90 | 8.9  | 8.40  | 8.40  | 8.40  |
| Voapaka         | 4  | 20.14 | 5.00 | 67.10 | 15.63 | 6.08  | 30.06 | 21.10 | 5.10 | 67.1 | 14.19 | 4.79  | 28.25 |
| Voapaka (B)     | 9  | 8.23  | 5.40 | 16.10 | 9.56  | 6.42  | 13.62 | 8.53  | 5.40 | 17.3 | 9.10  | 5.59  | 12.80 |
| Voara           | 6  | 13.37 | 5.10 | 34.20 | 11.58 | 5.53  | 19.26 | 14.77 | 6.50 | 34.2 | 9.52  | 4.03  | 18.32 |
| Voariana        | 12 | 5.80  | 5.80 | 5.80  | -     | -     | -     | -     | -    | -    | -0.77 | -0.77 | -0.77 |
| Voarotra        | 6  | 10.10 | 5.70 | 18.00 | 9.99  | 1.16  | 17.33 | 10.07 | 5.50 | 18   | 9.83  | 4.29  | 15.95 |
| Volomborona     | 1  | 25.02 | 5.90 | 59.90 | 17.67 | 7.18  | 41.85 | 24.39 | 6.00 | 59.9 | 16.12 | 6.26  | 40.88 |
| Volosy (bamboo) | 7  | -     | -    | -     | 17.82 | 17.82 | 17.82 | 6.80  | 6.80 | 6.8  | -     | -     | -     |
| Vongo           | 5  | 10.42 | 5.00 | 26.80 | 12.25 | 6.40  | 20.29 | 12.60 | 6.60 | 26.8 | 10.70 | 4.44  | 23.57 |
| Vonitra         | 9  | 10.89 | 0.00 | 15.80 | 9.40  | 2.91  | 15.28 | 10.83 | 5.10 | 15.8 | 8.32  | 2.70  | 14.90 |
| Vonoa           | 7  | 14.63 | 6.70 | 27.20 | 11.70 | 6.34  | 17.43 | 14.93 | 6.80 | 27.7 | 10.36 | 6.27  | 16.21 |
| Zamalotra       | 7  | 12.46 | 6.40 | 38.60 | 16.92 | 13.42 | 22.32 | 19.27 | 9.20 | 38.8 | 11.80 | 1.04  | 21.58 |
| Zambo           | 11 | 5.00  | 5.00 | 5.00  | -     | -     | -     | -     | -    | -    | 5.41  | 5.41  | 5.41  |
| Zambo (B)       | 11 | 8.30  | 8.30 | 8.30  | -     | -     | -     | -     | -    | -    | 9.22  | 9.22  | 9.22  |
| Zanamena        | 3  | 14.55 | 5.80 | 37.10 | 13.80 | 8.76  | 19.32 | 14.58 | 5.90 | 37.1 | 13.35 | 8.30  | 18.73 |

## Supplementary D: Zahamena National Park Inventory Plot Summary

**Table D-1.** Zahamena National Park (ZNP) forest inventory plot summary table lists the Family Name, Scientific Name and Malagasy Name for each species of tree measured within the 35 small inventory plots (10m-diameter) in 2008. For each species, the FORMIND model plant functional type number is listed, as well as stem count per hectare, mean diameter in centimeters, minimum diameter in centimeters, maximum diameter in centimeters, mean height in meters, minimum height in meters and maximum height in meters. Unknown species are denoted by an asterisk. Unknown or not measured numeric values are indicated by dashes. .

| Family         | Scientific Name      | MalagasyName         | PFT | Stem<br>Count<br>per ha | Mean<br>DBH<br>(cm) | Minimum<br>DBH<br>(cm) | Maximum<br>DBH<br>(cm) | Mean<br>Height<br>(m) | Minimum<br>Height<br>(m) | Maximum<br>Height<br>(m) |
|----------------|----------------------|----------------------|-----|-------------------------|---------------------|------------------------|------------------------|-----------------------|--------------------------|--------------------------|
| Malvaceae      | Hildegardia perrieri | Afobonoa maintso (B) | 8   | 4                       | 12.40               | 12.40                  | 12.40                  | 16.97                 | 16.97                    | 15.97                    |
| *              | *                    | Afomena              | 1   | 25                      | 11.50               | 5.80                   | 16.10                  | 24.17                 | 10.72                    | 43.28                    |
| Malvaceae      | Grewia cuneifolia    | Afopotsy             | 8   | 7                       | 19.05               | 7.80                   | 30.30                  | 9.50                  | 9.50                     | 9.50                     |
| Malvaceae      | Grewia sp.1          | Afopotsy (B)         | 3   | 4                       | 5.40                | 5.40                   | 5.40                   | 26.16                 | 26.16                    | 26.16                    |
| Malvaceae      | Grewia sp.3          | Afopotsy (S)         | 8   | 7                       | 7.67                | 5.10                   | 12.00                  | 11.42                 | 8.47                     | 14.08                    |
| Malvaceae      | Nesogordonia sp.1    | Afotrakora           | 3   | 15                      | 5.65                | 5.40                   | 6.10                   | 9.95                  | 8.01                     | 11.01                    |
| Sarcolenaceae  | Leptolaena sp.2      | Amaninombilahy       | 1   | 55                      | 19.93               | 5.70                   | 49.30                  | 20.10                 | 4.73                     | 45.16                    |
| Araliaceae     | Polyscias sp.3       | Ambonambona          | 3   | 4                       | 7.30                | 7.30                   | 7.30                   | 6.30                  | 6.30                     | 6.30                     |
| Monimiaceae    | Ehippiandra sp.3     | Ambora               | 5   | 11                      | 22.73               | 8.70                   | 50.80                  | 20.50                 | 17.07                    | 23.35                    |
| Monimiaceae    | Ehippiandra sp.4     | Ambora (S)           | 5   | 18                      | 15.83               | 6.20                   | 36.70                  | 13.88                 | 5.87                     | 23.76                    |
| Menispermaceae | Burasaia sp.1        | Amborasaha           | 8   | 7                       | 9.27                | 7.90                   | 10.20                  | 12.94                 | 10.49                    | 17.12                    |
| Pittosporaceae | Pittosporum sp1      | Ambovitsika (B)      | 8   | 4                       | 5.90                | 5.90                   | 5.90                   | 22.77                 | 22.77                    | 22.77                    |
| Moraceae       | Ficus sorocoides     | Ampalirano           | 11  | 4                       | 14.90               | 14.90                  | 14.90                  | 18.24                 | 18.24                    | 18.24                    |
| Rubiaceae      | Fernelia sp.5        | Ankahatra (B)        | 3   | 29                      | 9.53                | 5.10                   | 14.70                  | 15.45                 | 8.28                     | 29.96                    |
| Rubiaceae      | Fernelia sp.3        | Ankahatra (M)        | 2   | 15                      | 5.60                | 5.20                   | 5.80                   | 14.11                 | 6.66                     | 24.62                    |
| Rubiaceae      | Fernelia sp.4        | Ankahatra (S)        | 5   | 25                      | 8.51                | 6.20                   | 10.80                  | 13.94                 | 10.17                    | 18.88                    |
| *              | *                    | Antafara (B)         | 6   | 4                       | 5.60                | 5.60                   | 5.60                   | 6.14                  | 6.14                     | 6.14                     |
| Lauraceae      | Ocotea sp.3          | Antafonana (B)       | 1   | 7                       | 15.05               | 12.90                  | 17.20                  | 50.42                 | 34.87                    | 65.97                    |
| Lauraceae      | Ocotea sp.1          | Antafonana (M)       | 3   | 22                      | 16.02               | 5.10                   | 37.30                  | 18.70                 | 10.04                    | 30.16                    |
| Lauraceae      | Ocotea sp.2          | Antafonana (S)       | 11  | 11                      | 6.00                | 5.40                   | 6.30                   | 6.66                  | 5.25                     | 7.37                     |
| Lauraceae      | Beilschmiedia sp.3   | Antevaratra (B)      | 3   | 33                      | 10.77               | 6.50                   | 22.70                  | 16.39                 | 6.48                     | 28.13                    |
| Lauraceae      | Beilschmiedia sp.4   | Antevaratra (M)      | 1   | 33                      | 20.61               | 5.00                   | 73.30                  | 25.72                 | 5.81                     | 66.29                    |



|                 |                                      |                        |    |    |        |        |        |       |       |       |
|-----------------|--------------------------------------|------------------------|----|----|--------|--------|--------|-------|-------|-------|
| Lauraceae       | Beilschmiedia sp.5                   | Antevaratra (S)        | 1  | 22 | 14.86  | 5.00   | 33.20  | 18.16 | 6.46  | 30.20 |
| Bignoniaceae    | Phyllarthron sp.1                    | Antohiravina (B)       | 3  | 7  | 7.85   | 6.30   | 9.40   | 21.44 | 16.60 | 26.28 |
| Sarcolenaceae   | Rhodolaena sp.2                      | Arina (B)              | 1  | 11 | 20.83  | 7.10   | 59.80  | 28.64 | 4.88  | 69.02 |
| *               | *                                    | Arongaparnihy (B)      | 9  | 4  | 104.60 | 104.60 | 104.60 | -     | -     | -     |
| Combretaceae    | Terminalia sp.1                      | Atafanala (B)          | 9  | 7  | 7.40   | 6.90   | 7.90   | 12.85 | 11.94 | 13.76 |
| Combretaceae    | Terminalia sp.2                      | Atafanala (M)          | 2  | 11 | 40.27  | 11.70  | 67.90  | 31.62 | 15.59 | 47.64 |
| *               | *                                    | Azinina                | 6  | 7  | 7.97   | 5.20   | 10.20  | 15.52 | 10.62 | 21.54 |
| *               | *                                    | Azinina (B)            | 1  | 25 | 10.44  | 5.70   | 26.60  | 20.16 | 5.32  | 46.65 |
| *               | *                                    | Azinina (M)            | 8  | 7  | 5.50   | 5.50   | 5.50   | 9.80  | 9.20  | 10.40 |
| *               | *                                    | Azinina (S)            | 3  | 40 | 13.80  | 5.10   | 45.40  | 15.10 | 6.19  | 25.25 |
| Dilleniaceae    | Dillenia sp.1                        | Bararaty               | 1  | 7  | 18.35  | 16.30  | 20.40  | 43.64 | 25.54 | 61.73 |
| *               | *                                    | Bobaka/vahona          | 6  | 4  | 12.70  | 12.70  | 12.70  | 19.55 | 19.55 | 19.55 |
| Rutaceae        | Zanthoxylum sp.4                     | Fahavalotrazo          | 3  | 7  | 11.60  | 5.90   | 17.30  | 12.80 | 12.80 | 12.80 |
| *               | *                                    | Famelona ravina maitso | 5  | 15 | 8.40   | 7.20   | 10.50  | 14.90 | 10.74 | 19.99 |
| Aphloiaceae     | Aphloia theaformis                   | Fandramanana           | 5  | 4  | 26.50  | 26.50  | 26.50  | 30.98 | 30.98 | 30.98 |
| Fabaceae        | Bauhinia sp.1                        | Fanitokakolahy (S)     | 1  | 15 | 10.80  | 7.20   | 13.50  | 29.30 | 21.49 | 38.11 |
| Cyatheaceae     | Cyathea sp.1                         | Fanzana                | 8  | 22 | 8.18   | 5.40   | 11.50  | 8.29  | 3.24  | 17.50 |
| Rutaceae        | Vepris fitoravy                      | Fitoravina             | 12 | 4  | 5.10   | 5.10   | 5.10   | 6.85  | 6.85  | 6.85  |
| Convallariaceae | Dracaena sp.2                        | Hasina (B)             | 9  | 18 | 9.18   | 5.10   | 17.70  | 9.32  | 1.62  | 23.63 |
| Convallariaceae | Dracaena reflexa                     | Hasina (M)             | 11 | 22 | 7.86   | 5.20   | 10.40  | 10.95 | 5.05  | 9.73  |
| Convallariaceae | Dracaena reflexa var<br>linearifolia | Hasina (S)             | 8  | 18 | 7.88   | 5.90   | 9.90   | 7.07  | 3.55  | 10.43 |
| Convallariaceae | Dracaena sp.3                        | Hasina (VL)            | 8  | 4  | 14.90  | 14.90  | 14.90  | 19.79 | 19.79 | 15.79 |
| Euphorbiaceae   | Suregada sp.2                        | Hazoboangy             | 6  | 11 | 14.50  | 5.30   | 21.70  | 15.93 | 5.36  | 23.28 |
| *               | *                                    | Hazomafana (B)         | 1  | 7  | 22.05  | 16.50  | 27.60  | 41.12 | 38.19 | 44.04 |
| *               | *                                    | Hazomafana (M)         | 8  | 4  | 6.40   | 6.40   | 6.40   | 14.60 | 14.60 | 14.60 |
| Ebenaceae       | Diospyros sp.1                       | Hazomainty             | 3  | 33 | 12.80  | 5.50   | 39.10  | 18.34 | 5.77  | 32.92 |
| Rhizophoraceae  | Cassipourea<br>lanceolata            | Hazomainty (B)         | 5  | 4  | 7.90   | 7.90   | 7.90   | 19.80 | 19.80 | 19.80 |
| Rhizophoraceae  | Cassipourea sp.4                     | Hazomainty (M)         | 1  | 29 | 13.40  | 5.30   | 86.70  | 15.04 | 4.21  | 32.62 |
| Rhizophoraceae  | Cassipourea sp.2                     | Hazomainty (S)         | 5  | 29 | 14.55  | 5.10   | 51.90  | 11.53 | 6.40  | 13.89 |
| *               | *                                    | Hazomalany (B)         | 3  | 15 | 8.58   | 5.40   | 16.60  | 16.07 | 10.12 | 30.47 |

|                 |                                |                              |    |     |       |       |       |       |       |       |
|-----------------|--------------------------------|------------------------------|----|-----|-------|-------|-------|-------|-------|-------|
| Anacardiaceae   | Abrahamia sp.1                 | Hazombarorona (B)            | 6  | 18  | 11.72 | 5.80  | 25.40 | 16.10 | 8.21  | 21.29 |
| Anacardiaceae   | Abrahamia sp.2                 | Hazombarorona (M)            | 6  | 18  | 16.24 | 5.30  | 48.30 | 16.20 | 10.74 | 23.98 |
| Sapindaceae     | Tina sp.2                      | Hazombarorona (S)            | 2  | 18  | 12.50 | 5.30  | 40.20 | 20.76 | 11.43 | 40.13 |
| Passifloraceae  | Paropsia sp.1                  | Hazomitovo                   | 9  | 4   | 5.60  | 5.60  | 5.60  | 9.95  | 9.95  | 9.95  |
| Euphorbiaceae   | Tannodia sp.1                  | Hazondomoina                 | 3  | 29  | 7.30  | 5.00  | 13.80 | 14.01 | 4.80  | 34.87 |
| Myrsinaceae     | Oncostemum sp.2                | Hazontoho (B)                | 1  | 15  | 10.80 | 5.30  | 16.10 | 21.71 | 8.11  | 43.67 |
| Myrsinaceae     | Oncostemum sp.3                | Hazontoho (M)                | 8  | 36  | 8.67  | 5.20  | 13.10 | 11.72 | 5.95  | 15.79 |
| Myrsinaceae     | Oncostemum sp.4                | Hazontoho (S)                | 8  | 11  | 8.73  | 7.90  | 10.30 | 10.31 | 9.22  | 10.93 |
| Rubiaceae       | Coffea sp.2                    | Kafeala (M)                  | 6  | 4   | 11.80 | 11.80 | 11.80 | 21.98 | 21.98 | 21.98 |
| *               | *                              | Kijy                         | 2  | 11  | 22.53 | 7.50  | 32.40 | 31.55 | 13.95 | 42.69 |
| Euphorbiaceae   | Anthostema<br>madagascariensis | Lalotona                     | 1  | 102 | 21.72 | 5.50  | 56.70 | 23.55 | 8.14  | 50.81 |
| Euphorbiaceae   | Croton nobilis                 | Lazalaza                     | 9  | 11  | 6.37  | 5.40  | 7.60  | 5.70  | 4.50  | 6.44  |
| *               | *                              | Lombiro beravina<br>matevina | 1  | 11  | 24.10 | 5.90  | 38.50 | 24.33 | 19.51 | 33.11 |
| Hamamelidaceae  | Dicoryphe sp.3                 | Longotra (B)                 | 5  | 7   | 29.70 | 18.90 | 40.50 | 22.30 | 22.30 | 22.30 |
| Lauraceae       | Aspidostemon perrieri          | Longotra fotsy               | 5  | 7   | 13.90 | 12.00 | 15.80 | 22.53 | 17.30 | 27.75 |
| Lauraceae       | Aspidostemon sp.1              | Longotra mena                | 5  | 11  | 16.87 | 6.60  | 25.40 | 21.38 | 19.82 | 22.94 |
| Euphorbiaceae   | Macaranga sp.3                 | Makaranana                   | 10 | 22  | 13.78 | 6.40  | 29.00 | 14.23 | 2.15  | 15.62 |
| *               | *                              | Mampay (B)                   | 1  | 73  | 16.45 | 5.20  | 47.00 | 22.63 | 6.30  | 58.13 |
| *               | *                              | Mampay (S)                   | 1  | 33  | 15.67 | 5.20  | 37.40 | 18.87 | 7.44  | 44.78 |
| Sapindaceae     | Beguea apetalia                | Marankoditra                 | 3  | 15  | 9.06  | 6.30  | 16.00 | 10.85 | 4.75  | 17.12 |
| Euphorbiaceae   | Blotia sp.2                    | Maroando                     | 5  | 65  | 7.11  | 5.10  | 12.30 | 11.35 | 4.81  | 28.02 |
| Anacardiaceae   | Campylopermum<br>obtusifolium  | Menahihy (B)                 | 5  | 18  | 10.70 | 6.50  | 18.70 | 15.52 | 7.87  | 35.28 |
| Anacardiaceae   | Campylopermum<br>sp.4          | Menahihy (M)                 | 5  | 15  | 10.86 | 6.30  | 13.60 | 19.35 | 11.39 | 28.31 |
| Erythroxylaceae | Campylopermum<br>sp.3          | Menahihy (S)                 | 1  | 44  | 9.53  | 5.50  | 16.10 | 18.02 | 1.98  | 39.52 |
| Arecaceae       | Dypsis lastelliana             | Menavozona                   | 9  | 15  | 22.02 | 12.30 | 30.20 | 12.30 | 8.98  | 15.62 |
| Malvaceae       | Dombeya sp.4                   | Molanga                      | 10 | 4   | 15.80 | 15.80 | 15.80 | -     | -     | -     |

|                |                           |                       |    |    |       |       |       |       |       |       |
|----------------|---------------------------|-----------------------|----|----|-------|-------|-------|-------|-------|-------|
| Elaeocarpaceae | Elaeocarpus sp.6          | Molopangady (S)       | 1  | 11 | 15.70 | 12.30 | 20.70 | 30.18 | 17.55 | 42.81 |
| Elaeocarpaceae | Elaeocarpus sp.7          | Molopangady fotsy (S) | 1  | 11 | 17.03 | 12.00 | 26.50 | 24.80 | 10.97 | 49.26 |
| Elaeocarpaceae | Elaeocarpus sp.8          | Molopangady mena      | 1  | 7  | 21.53 | 13.40 | 30.00 | 30.93 | 23.08 | 38.78 |
| Anacardiaceae  | Camptosperma sp.1         | Nanto (B)             | 1  | 15 | 29.85 | 12.10 | 54.20 | 26.87 | 10.35 | 40.80 |
| Sapotaceae     | Faucherea sp.3            | Nanto (M)             | 3  | 7  | 49.60 | 34.60 | 64.60 | 30.14 | 30.14 | 30.14 |
| Sapotaceae     | Faucherea sp.4            | Nanto (S)             | 1  | 22 | 17.44 | 7.70  | 44.30 | 21.43 | 11.97 | 49.73 |
| Sapotaceae     | Faucherea sp.2            | Nanto (VL)            | 5  | 4  | 9.40  | 9.40  | 9.40  | 20.96 | 20.96 | 20.96 |
| Anacardiaceae  | Michronychia tsiramiramy  | Oditrovy              | 5  | 18 | 10.28 | 5.10  | 14.60 | 14.88 | 6.71  | 23.45 |
| Annonaceae     | Isolona sp.1              | Ombavy                | 1  | 15 | 10.40 | 5.20  | 21.50 | 22.02 | 7.50  | 49.90 |
| Sapindaceae    | Eugenia sp.3              | Ompa                  | 1  | 25 | 11.81 | 5.10  | 24.80 | 22.91 | 10.51 | 55.51 |
| Arecaceae      | Dypsis fasciculata        | Ovana                 | 9  | 7  | 6.15  | 5.80  | 6.50  | 14.46 | 12.43 | 16.49 |
| Arecaceae      | Oriana trispatha          | Ovobola fotsy         | 5  | 4  | 9.50  | 9.50  | 9.50  | 11.28 | 11.28 | 11.28 |
| Arecaceae      | Dypsis sp.2               | Ovodafa               | 9  | 4  | 34.30 | 34.30 | 34.30 | -     | -     | -     |
| Burseraceae    | Canarium madagascariensis | Ramy                  | 1  | 47 | 26.96 | 5.80  | 81.50 | 18.94 | 4.24  | 34.18 |
| Burseraceae    | Canarium sp.2             | Ramy (B)              | 1  | 7  | 56.30 | 31.10 | 81.50 | 48.30 | 30.16 | 66.43 |
| Myrsinaceae    | Maulouchia sp.1           | Rara (M)              | 1  | 98 | 12.89 | 5.00  | 43.50 | 17.46 | 5.32  | 42.53 |
| Strelitziaceae | Ravenala madagascariensis | Ravinala              | 2  | 18 | 35.62 | 26.50 | 43.70 | 27.98 | 17.87 | 44.22 |
| Sapindaceae    | Tinopsis urchii           | Romendafa (S)         | 5  | 4  | 9.30  | 9.30  | 9.30  | 15.42 | 15.42 | 15.42 |
| Myrtaceae      | Syzygium sp.2             | Rotra (B)             | 1  | 7  | 18.25 | 5.90  | 30.60 | 32.71 | 32.71 | 32.71 |
| Myrtaceae      | Syzygium sp.3             | Rotra (M)             | 3  | 7  | 10.85 | 8.80  | 12.90 | 10.11 | 9.00  | 11.22 |
| Rubiaceae      | Gaertnera sp.2            | Sadoka (B)            | 5  | 22 | 9.66  | 6.50  | 12.40 | 13.68 | 7.29  | 23.23 |
| Rubiaceae      | Gaertnera sp.6            | Sadoka (M)            | 11 | 11 | 7.53  | 5.40  | 10.00 | 6.31  | 4.72  | 8.36  |
| Rubiaceae      | Gaertnera sp.4            | Sadoka (S)            | 8  | 33 | 6.66  | 5.20  | 9.20  | 9.12  | 4.81  | 18.61 |
| *              | *                         | Sakoanala             | 6  | 4  | 7.50  | 7.50  | 7.50  | 17.02 | 17.02 | 17.02 |
| Apocynaceae    | Cerbera sp.1              | Samata                | 12 | 4  | 7.70  | 7.70  | 7.70  | 11.36 | 11.36 | 9.36  |
| Bignoniaceae   | Ophiocolea sp.2           | Sefontsohihy          | 12 | 7  | 5.90  | 5.50  | 6.30  | 10.28 | 9.42  | 9.14  |
| Bignoniaceae   | Ophiocolea sp.3           | Sefontsoy             | 12 | 4  | 5.50  | 5.50  | 5.50  | 11.14 | 11.14 | 9.14  |
| Sapindaceae    | Stadmania sp.3            | Sombotorona (B)       | 5  | 7  | 6.85  | 5.10  | 8.60  | 15.29 | 6.17  | 23.90 |
| Sapindaceae    | Stadmania sp.7            | Sombotorona (M hairy) | 8  | 7  | 6.35  | 5.10  | 7.60  | 14.85 | 14.08 | 15.61 |

|               |                                 |                         |    |    |       |       |       |       |       |       |
|---------------|---------------------------------|-------------------------|----|----|-------|-------|-------|-------|-------|-------|
| Sapindaceae   | Stadmania sp.6                  | Sombotorona (M smooth)  | 8  | 7  | 6.15  | 5.20  | 7.10  | 14.08 | 13.73 | 14.43 |
| *             | *                               | Tafara                  | 1  | 58 | 8.73  | 5.30  | 20.80 | 14.66 | 3.61  | 75.16 |
| *             | *                               | Tafara (B)              | 8  | 4  | 9.20  | 9.20  | 9.20  | 13.05 | 13.05 | 13.05 |
| *             | *                               | Tanantanampotsy         | 4  | 4  | 6.60  | 6.60  | 6.60  | 30.60 | 30.60 | 30.60 |
| Anacardiaceae | Micronychia sp1                 | Tarantana               | 1  | 15 | 24.93 | 15.90 | 32.80 | 39.73 | 26.93 | 61.73 |
| *             | *                               | Tavia                   | 7  | 15 | 7.40  | 5.10  | 9.10  | 15.81 | 10.87 | 19.32 |
| Lauraceae     | Cryptocarya sp.6                | Tavolo (B)              | 2  | 47 | 18.51 | 5.20  | 56.40 | 27.16 | 3.85  | 51.58 |
| Lauraceae     | Cryptocarya sp.7                | Tavolo (L)              | 2  | 29 | 7.74  | 6.30  | 12.30 | 26.69 | 12.47 | 43.75 |
| Lauraceae     | Cryptocarya sp.4                | Tavolo (S)              | 2  | 44 | 16.18 | 5.10  | 64.70 | 23.66 | 9.80  | 48.08 |
| Lauraceae     | Cryptocaria<br>thovenotii       | Tavolopika              | 5  | 4  | 8.10  | 8.10  | 8.10  | 24.50 | 24.50 | 23.50 |
| Rhamnaceae    | Bathiorhamnus<br>louvelii       | Telotritry              | 11 | 4  | 5.20  | 5.20  | 5.20  | 8.94  | 8.94  | 8.94  |
| Melastomaceae | Dichaetanthera sp.1             | Trotroka                | 6  | 4  | 9.50  | 9.50  | 9.50  | 17.66 | 17.66 | 17.66 |
| Moraceae      | Treculia sp.3                   | Trova (B)               | 1  | 44 | 10.83 | 5.20  | 30.20 | 15.70 | 6.97  | 35.70 |
| Moraceae      | Treculia sp.5                   | Trova (M)               | 3  | 25 | 11.57 | 7.20  | 25.20 | 14.78 | 8.30  | 22.55 |
| Moraceae      | Trilepisium<br>madagascariense  | Trova (S)               | 3  | 22 | 9.37  | 5.20  | 15.20 | 15.82 | 10.78 | 22.53 |
| Moraceae      | Treculia sp.4                   | Trova fotsy             | 8  | 11 | 7.57  | 5.70  | 9.50  | 14.56 | 12.34 | 17.14 |
| *             | *                               | Tsaravoasira            | 4  | 7  | 15.40 | 10.20 | 20.60 | 17.12 | 9.23  | 25.00 |
| *             | *                               | Tsiarinarina fotsy      | 12 | 4  | 5.10  | 5.10  | 5.10  | 9.00  | 9.00  | 9.00  |
| Rutaceae      | Zanthoxylum<br>madagascariensis | Tsihanihimposa          | 3  | 4  | 27.80 | 27.80 | 27.80 | 21.67 | 21.67 | 21.67 |
| Oleaceae      | Noronhia sp.1                   | Tsilaitra (B)           | 4  | 22 | 12.33 | 2.10  | 24.20 | 18.67 | 10.85 | 27.90 |
| Clusiaceae    | Paramammea sp.1                 | Tsilaitra (S)           | 7  | 15 | 7.33  | 5.30  | 10.20 | 13.58 | 6.99  | 19.80 |
| Clusiaceae    | Paramammea sp.2                 | Tsimahamasatsokina (BL) | 5  | 15 | 10.90 | 7.40  | 18.10 | 14.55 | 11.00 | 23.27 |
| Clusiaceae    | Paramammea sp.3                 | Tsimahamasatsokina (BS) | 8  | 11 | 12.27 | 5.90  | 17.10 | 11.28 | 8.67  | 13.28 |
| Clusiaceae    | Paramammea sp.4                 | Tsimahamasatsokina (SL) | 5  | 11 | 10.30 | 5.10  | 18.10 | 13.98 | 9.33  | 22.66 |
| Clusiaceae    | Paramammea sp.5                 | Tsimahamasatsokina (SS) | 11 | 4  | 7.60  | 7.60  | 7.60  | 8.30  | 8.30  | 8.30  |
| *             | *                               | Tsipatika               | 1  | 51 | 10.07 | 5.10  | 39.90 | 17.82 | 6.01  | 52.18 |
| *             | *                               | unknown                 | 5  | 7  | 21.55 | 9.10  | 34.00 | 16.51 | 9.88  | 23.13 |
| *             | *                               | Vadiandro               | 11 | 4  | 7.10  | 7.10  | 7.10  | 8.28  | 8.28  | 8.28  |

|               |                       |                  |    |    |       |       |       |       |       |       |
|---------------|-----------------------|------------------|----|----|-------|-------|-------|-------|-------|-------|
| Arecaceae     | Ravenea sp.2          | Vakaka           | 9  | 22 | 6.69  | 5.40  | 8.40  | 6.77  | 3.56  | 8.91  |
| Clusiaceae    | Calophyllum sp.1      | Vintanona        | 3  | 11 | 11.30 | 5.20  | 27.50 | 12.52 | 5.67  | 19.78 |
| Rubiaceae     | Rothmannia sp.1       | Voantalanina (B) | 3  | 33 | 11.53 | 6.20  | 19.40 | 22.26 | 11.85 | 32.24 |
| Rubiaceae     | Rothmannia sp.2       | Voantalanina (M) | 8  | 4  | 6.10  | 6.10  | 6.10  | 8.40  | 8.40  | 8.40  |
| Rubiaceae     | Rothmania foliacea    | Voantalanina (S) | 5  | 11 | 9.43  | 7.10  | 12.80 | 11.90 | 9.47  | 13.44 |
| Araliaceae    | Polyscias sp.2        | Voantsilana      | 8  | 7  | 9.03  | 6.30  | 14.10 | 16.47 | 13.49 | 18.04 |
| Euphorbiaceae | Uapaca sp.1           | Voapaka (M)      | 2  | 47 | 13.03 | 5.00  | 50.40 | 19.90 | 8.11  | 61.25 |
| Fabaceae      | Albizia guminifera    | Volomborona      | 7  | 7  | 16.25 | 10.50 | 22.00 | 19.94 | 16.52 | 23.36 |
| *             | *                     | Volosy (bamboo)  | 10 | 62 | 6.10  | 5.10  | 7.40  | 23.14 | 3.52  | 15.01 |
| *             | *                     | Vongo (B)        | 5  | 15 | 9.22  | 5.20  | 16.30 | 15.05 | 7.90  | 26.38 |
| Salicaceae    | Homalium sp.2         | Zamalotra        | 2  | 11 | 32.63 | 19.20 | 52.00 | 29.46 | 25.68 | 33.24 |
| Fabaceae      | Dialium unifoliolatum | Zanamena         | 2  | 7  | 20.80 | 12.50 | 29.10 | 55.40 | 54.08 | 56.71 |

---
